# Supplementary material
Source: PubMed Central journal article supplement (PMC3336742)
Supplement: NIHMS350944-supplement-1_si_001.pdf [file NIHMS350944-supplement-1_si_001.pdf]

# Multilayer DNA Origami Packed on Hexagonal and Hybrid Lattices

Yonggang Ke,<sup>†</sup> Niels V. Voigt,<sup>‡</sup> Kurt V. Gothelf,<sup>‡</sup> and William M. Shih<sup>†,§</sup>

**Assembly of DNA structures.** Scaffold DNA and all the staple strands (purchased from Bioneer) were mixed together at 1:5 ratio, in 1 x Tris-Mg<sup>2+</sup> buffer (Tris, 5 mM; EDTA, 1 mM; and magnesium chloride, 6-14 mM; pH 8.0). DNA structures were formed by slowly cooling the oligo mixtures from 80 °C to 24 °C over 72 hours.

**Agarose gel electrophoresis and sample purification.** Annealed DNA structures were purified by agarose gel (1.6% to 2%) electrophoresis. The DNA structure samples were loaded into agarose gel and allowed to run for 3 hours (running buffer: 1xTAE, 11mM MgCl<sub>2</sub>; running voltage: 70 volt). The leading bands corresponding to the correctly folded structures were then visualized with ultraviolet light and cut out from the gel. Excised bands were crushed and transferred into a DNA gel extraction spin column (BIO-RAD, Catalog number: 732-6166). DNA structure solution was recovered by centrifuging the column for 10 minutes at 16000g.

**TEM studies.** The TEM sample was prepared by dropping 3.5μL of sample solution on a carbon-coated grid (400 mesh, Ted pella). Before depositing the sample, the grids were negatively glow discharged for 45 seconds. After 2 minutes, the sample was wicked from the grid by touching its edge with a piece of filter paper. Then the grid was touched with a drop of 2 % uranyl formate solution and excess solution was wicked away with a filter paper. Again the grid was touched with a second drop of uranyl formate solution for 20 seconds, and the excess solution was removed with a filter paper. TEM studies were conducted using a JEOL JEM-1400 transmission electron microscope, operated at 80 kV on bright field mode.

**Native polyacrylamide gel electrophoresis (PAGE).** Native PAGE was done by using Bio-Rad Mini-Protean Tetra Cell. Buffer: 1xTBE (89mM tris base, 89mM boric acid, 2mM EDTA). Gel electrophoresis was carried out at constant 200 V for one to two hours.

**Figure S1.** TEM images of 12HB-L. Scale bar:  
100nm.

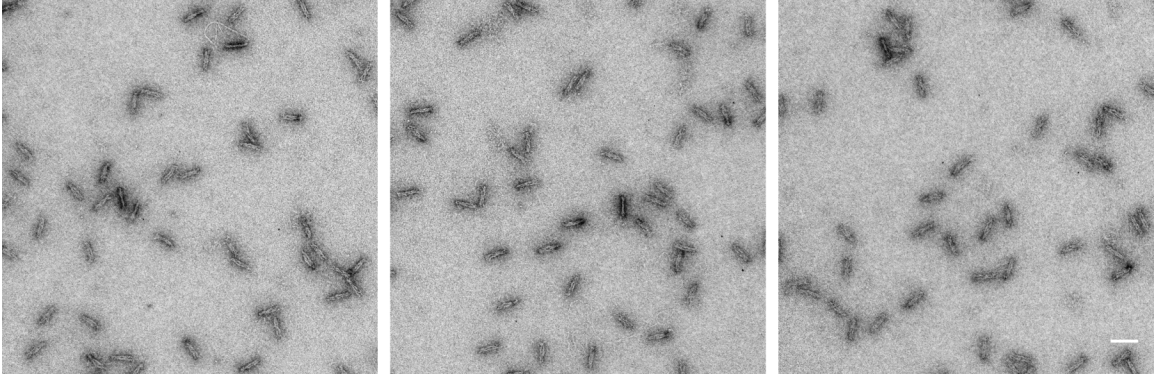

**Figure S2.** TEM images of 24HB-L. Scale bar:  
100nm.

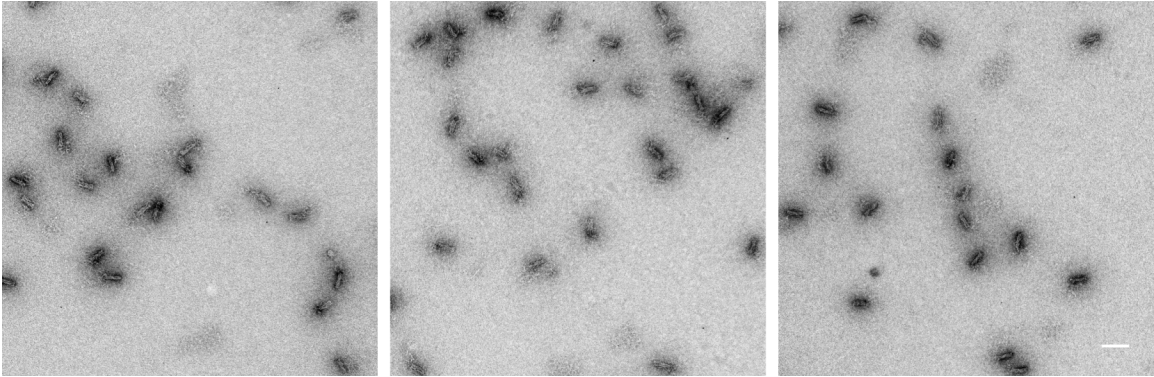

**Figure S3.** TEM images of 24HB-S. Scale bar:  
100nm.

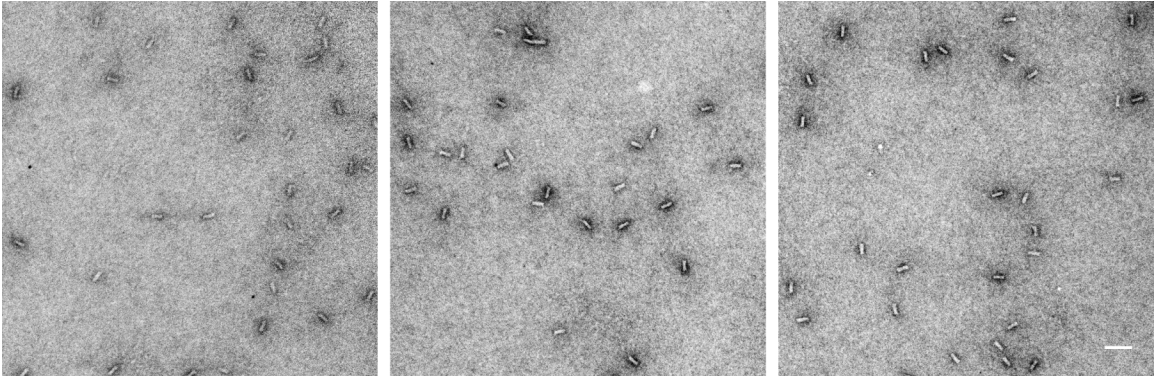

**Figure S4.** TEM images of 60HB-S. Scale bar:

100nm.

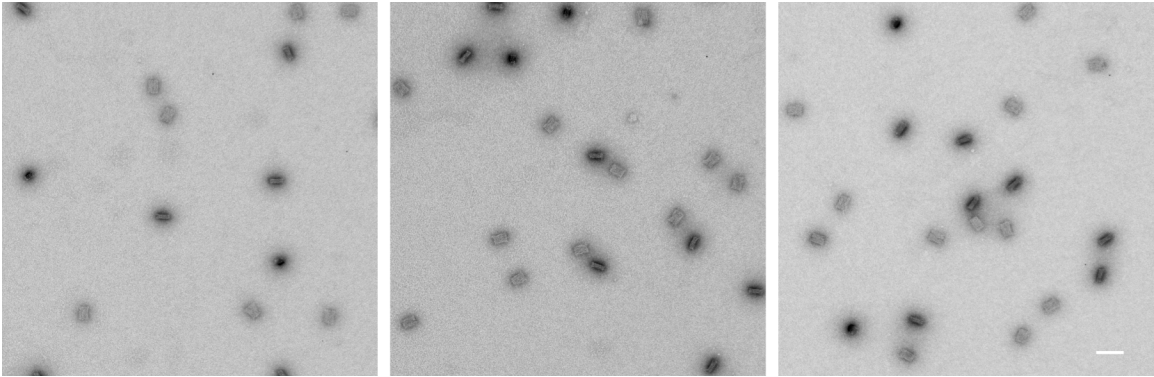

**Figure S5.** TEM images of 56HB Hybrid. Scale bar: 100nm.

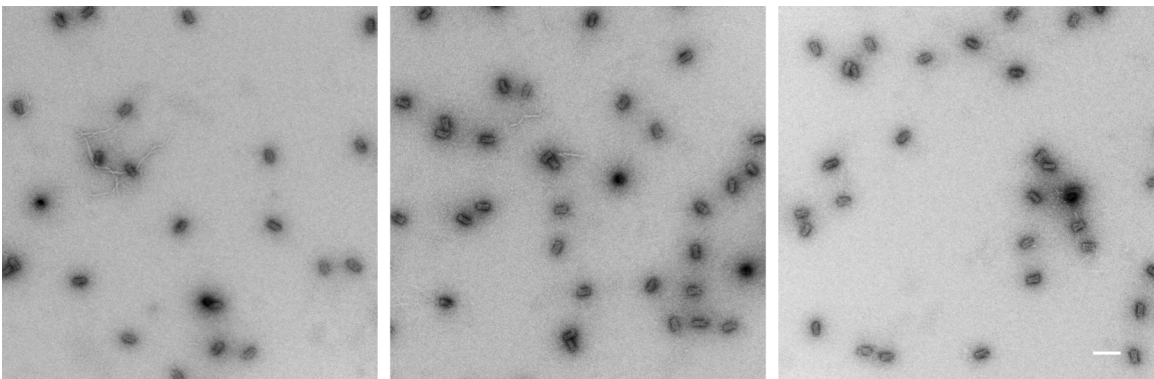

**Figure S6.** TEM images of 52HB Hybrid. Scale bar: 100nm.

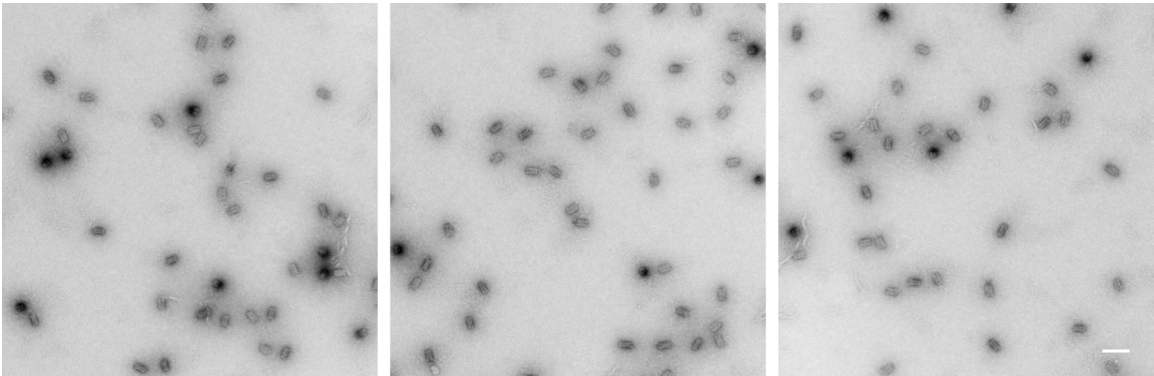

**Figure S7.** Histograms of measured X-, Y-, Z-dimensions of 12HB-L, 24HB-L, 24HB-S, 60HB-S, 56HB and 52HB. Data is acquired by measuring the particle sizes from TEM images. Y-axis is the number of events. Sample size: 100 particles for each dimension.

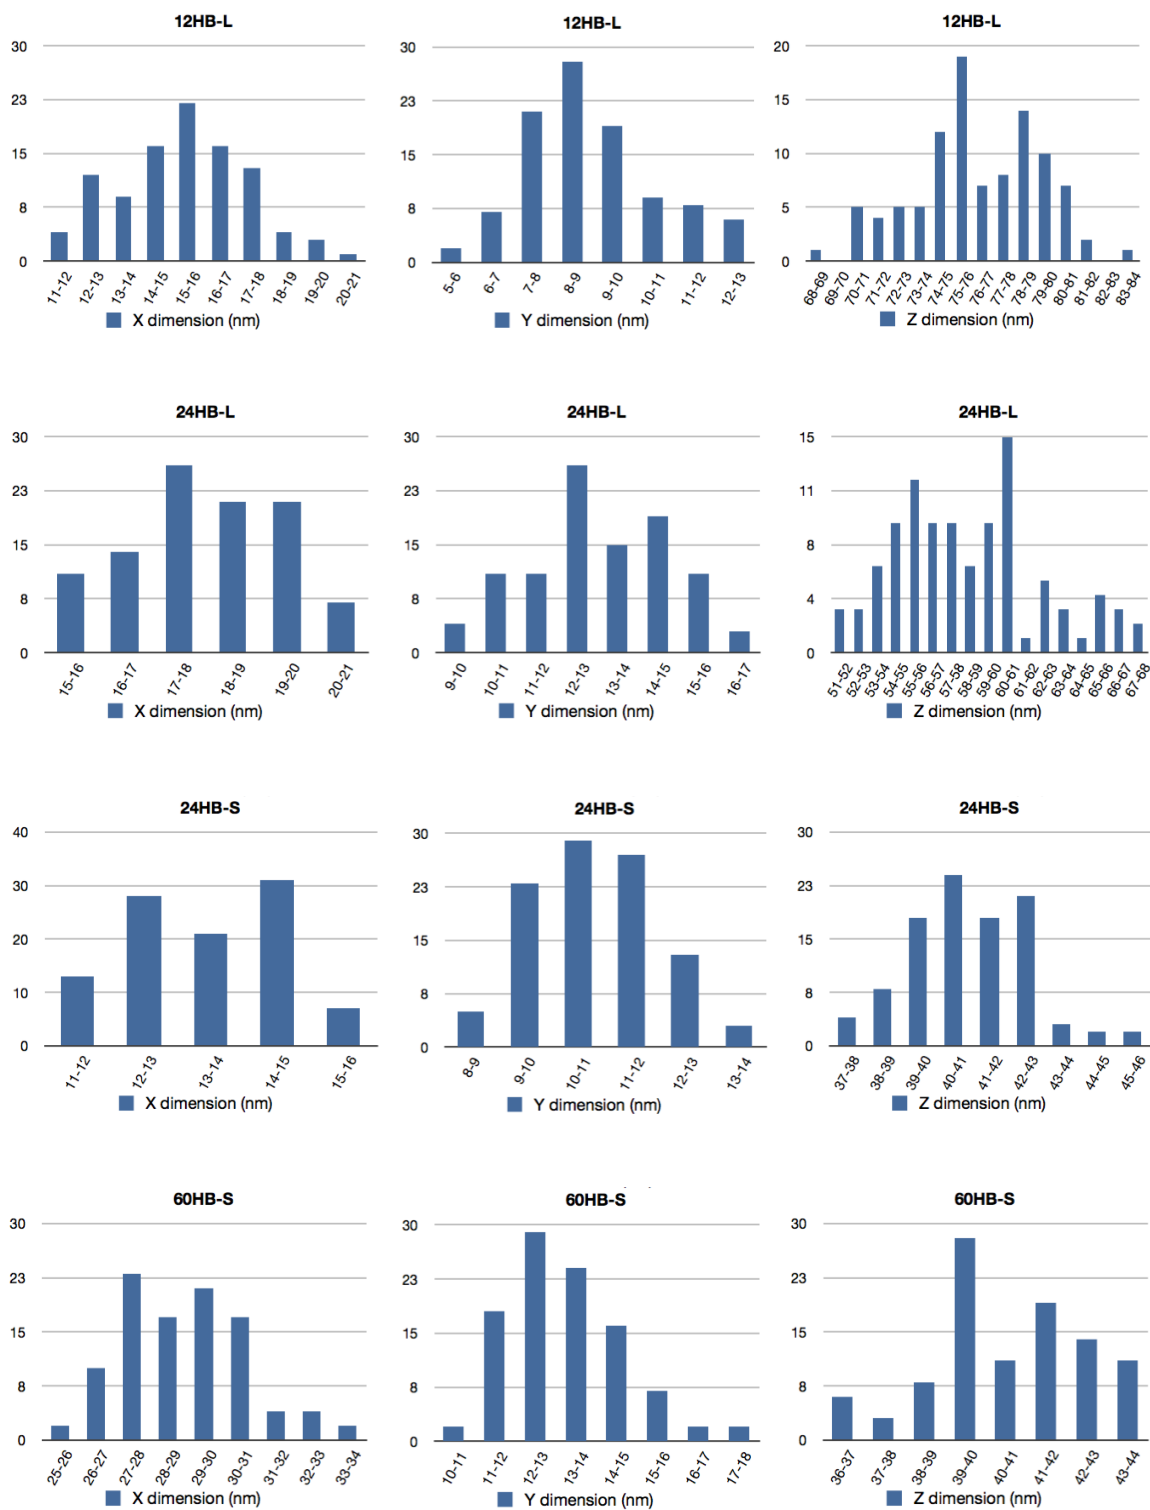

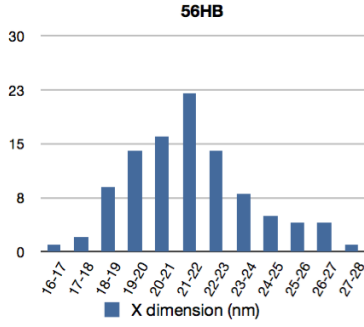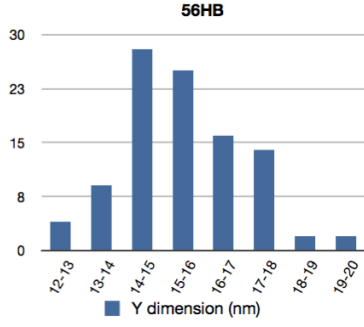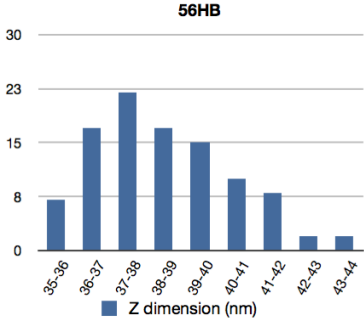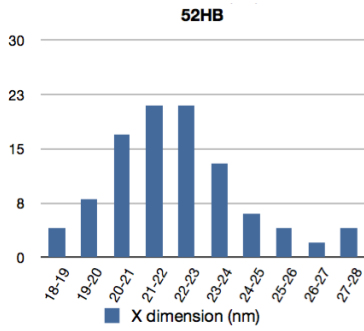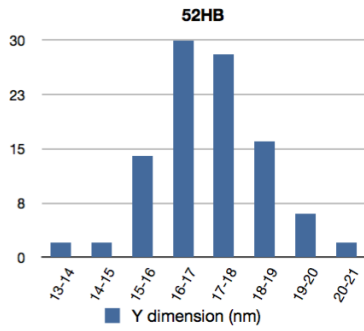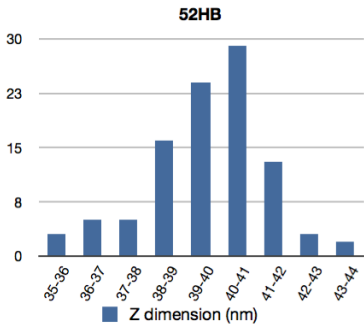

**Figure S8.** Analysis of staple-strand incorporation efficiency. Six inside staple strands (colored in green in Figure S11) and six outside staple strands (colored in red in Figure S11) were chosen from the 60HB-S design for the assay. Their information is shown in the table below. 60HB-S was first annealed and purified as described above. Final concentration was measured by absorbance at 260 nm wavelength assuming 50  $\mu\text{g/mL}$  for  $A_{260} = 1$ . To estimate incorporation percentage of each staple strand, we mixed its complementary strand (800 fmol) with 40 fmol purified 60HB-S, and performed a quick annealing (90 °C to 24 °C, 20 second per °C). The DNA duplex formed by the staple strand and its complementary strand was visualized and analyzed by native PAGE assay. Incorporation percentages were obtained by comparing the integrated intensity of the resulting DNA duplex band, as measured by Image J analysis, with that from control samples made by mixing the staple strand alone with the complement. To measure integrated band intensity in ImageJ, a box was drawn around the band, and a copy of this box was placed just above the band. The integrated intensity from the control box was subtracted from the integrated intensity of the experimental box to obtain the background-corrected experimental intensity.

Shown below is a control 10% native PAGE gel demonstrating how this assay can be used to quantitate the amount of staple strand present. Lane 1 shows staple strand (inside strand 1, 54mer) alone at 40 fmol. Lane 2 shows 800 fmol of the complementary strand. Lane 3 shows 20 fmol of the staple strand mixed with 800 fmol complementary strand, representing 50% incorporation efficiency. Lane 4 shows 40 fmol staple strand mixed with 800 fmol complementary strand, representing 100% incorporation efficiency. Image J analysis comparing bands from Lane 3 and Lane 4 shows a relative band intensity of 60%, roughly in agreement with the predicted relative intensity of 50%. The DNA duplex

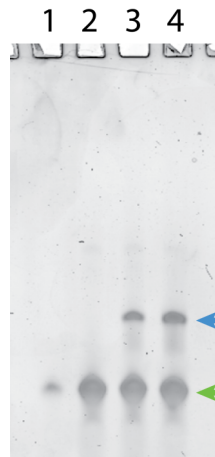

of interest appeared on the gel as the slow migrating band pointed by a blue arrow. Shown below to the left is a 10 percent native PAGE for analysis of longer staple strands (conditions described in Methods above). Shown below to the right is a 20 percent native PAGE for analysis of shorter staple strands (conditions described in Methods above). Lane 0 shows 40 fmol 60HB-S, while Lanes 1–12 (+) samples show 40 fmol 60HB-S and 800 fmol complementary strand, and Lanes 1–12 (-) show control samples with 40 fmol individual staple strand and 800 fmol complementary strand. Thus (+)

samples are the equivalent of Lane 3 in the control gel above, and (-) samples are the equivalent of Lane 4 in the control gel above.

All samples were subjected to the 20-minute quick annealing step before loading into the gels. Note the duplex band formed by staple 10 and its complementary strand overlapped with one band that exists in the 60HB-S-only sample (lane 0). Thus the incorporation

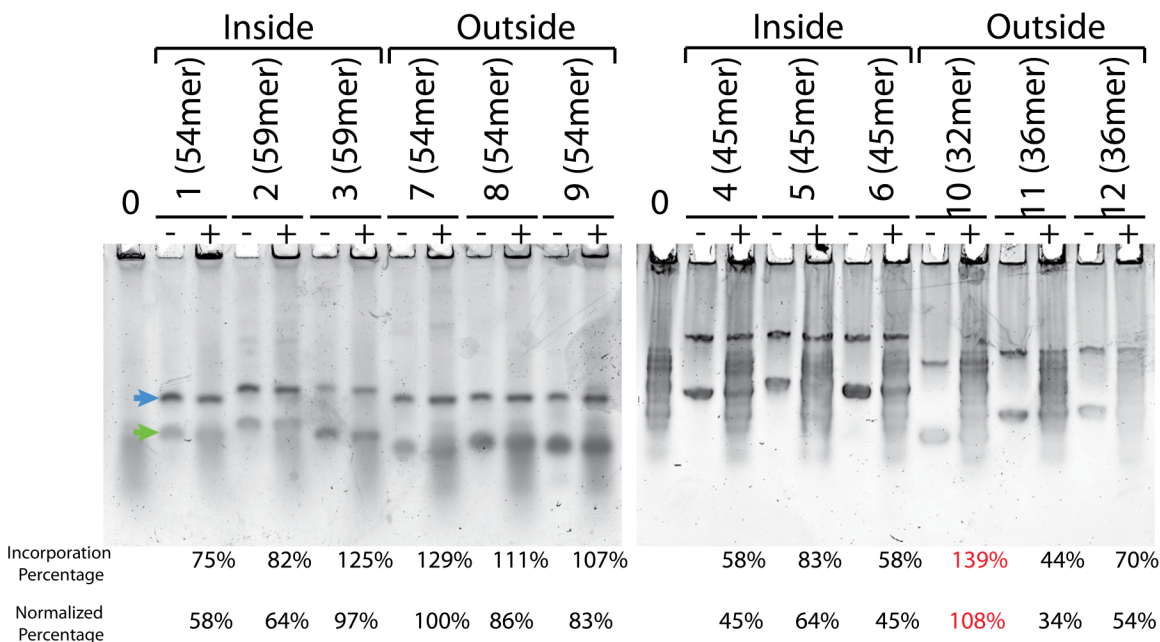

percentage of staple 10 is likely overestimated.

Note that the measured incorporation efficiencies often exceed the theoretical maximum of 100%. We attribute this to errors in estimation of the concentration of gel purified 60HB-S and errors in estimation of concentration of control staple strands (e.g. due to errors in estimation of extinction coefficients between the different strands). We also include an incorporation percentage that is normalized to the highest reliable incorporation efficiency observed (sample 7). Also note that loss of staple strands could be due either to lack of incorporation during folding, but also from loss during purification.

As can be seen from inspection of the data, shorter strands from either inside or outside appear to have much lower incorporation efficiencies on average (51% incorporation of inside strands of mean length 45 bases versus 73% incorporation of inside strands of mean length 57 bases; 44% incorporation of outside strands of mean length 35 versus 90% incorporation of outside strands of mean length 54). Inside strands of mean length 57 bases had a 20% lower incorporation efficiency than outside strands of mean length 54. Collectively, this data suggests that greater incorporation efficiency can be obtained by increasing the length of strands, and that the requirement for longer length is greater for inside strands than for outside strands.

| Inside staples  | Sequence (length)                                                | Incorporation percentage (%) | Normalized percentage (%) |
|-----------------|------------------------------------------------------------------|------------------------------|---------------------------|
| 1               | TAAGAGAATCAGAGAGAATAACATAAAGTATAAAGCCAACGCTCATTACAAAAT (54)      | 75                           | 58                        |
| 2               | AATAACCGAACTCTAGGAAGGTTAAAGTTGAACGACCAGTACGCCAGAATCACGAAA(59)    | 82                           | 64                        |
| 3               | CGAGGCGTTGCAAGCAAAAAATATTGAGTACGGTGTCAATAACCTGGTGGCAACCCTAT (59) | 125                          | 97                        |
| 4               | TAATCTATTAATTGTCAATGTAATCGAGGCTGCGCTAACGCCAG (45)                | 58                           | 45                        |
| 5               | ATATAAGTATGCCCCCTGATATAAAAGAAACGAAAAGCAAACGT (45)                | 83                           | 64                        |
| 6               | AAACAGGAATTTTGGAGAATTAATTTTCCTTAGAAAGTGAATAA (45)                | 58                           | 45                        |
| Outside staples |                                                                  |                              |                           |
| 7               | TCAGAGCCACCACCTCAGCAAAAGAATACACTAAAGCCACTACGAAGGCACCA (54)       | 129                          | 100                       |
| 8               | AAACAGCCATATTATTTATCCCAATCCTAGCACCATACCATTAGGCCATTGG (54)        | 111                          | 86                        |
| 9               | AGTGTAGCGGTCACGCTGAAAGCGAAAGGAGCGGGCATAAAAAATACCGAACG (54)       | 107                          | 83                        |
| 10              | ATTTTGGGGATGGTGCACCCAGCTTAAATCA (32)                             | 139                          | 108                       |
| 11              | TTGCTGAACCAATGAAAGAACAAGAGTCCACTATT (36)                         | 44                           | 34                        |
| 12              | GATAAATTGTGTCGAAATACCATAAATTTAAACAGT (36)                        | 70                           | 54                        |



**Figure S9.** Illustration of 12HB-L design. Blue strand is the scaffold strand and black strands are staple strands. Arrows indicate 3'-end of DNA.

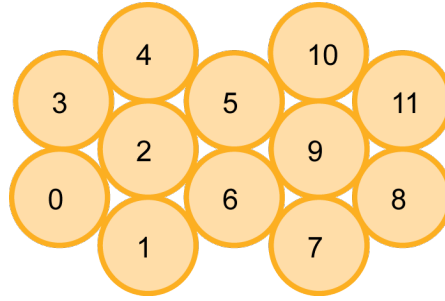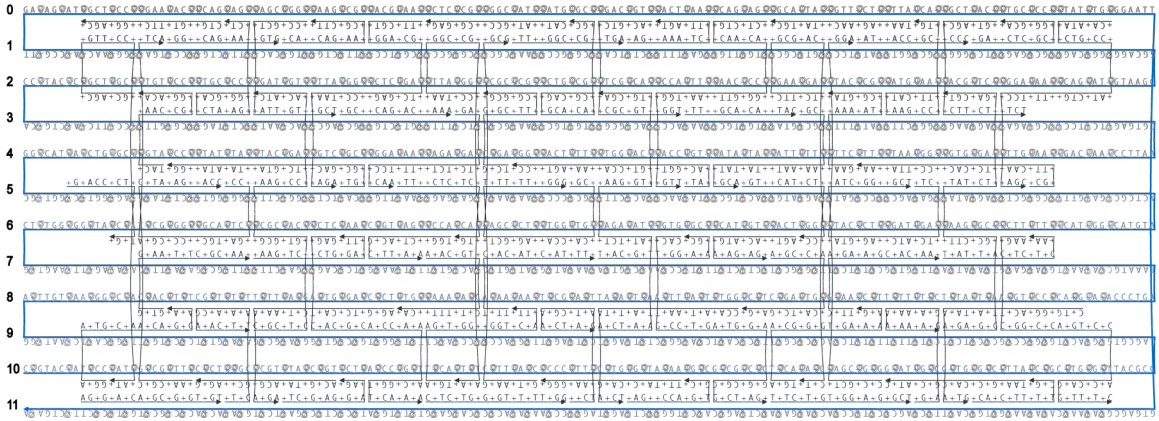

**Figure S10.** Illustration of 24HB-L design. Blue strand is the scaffold strand and black strands are staple strands. Arrows indicate 3'-end of DNA.

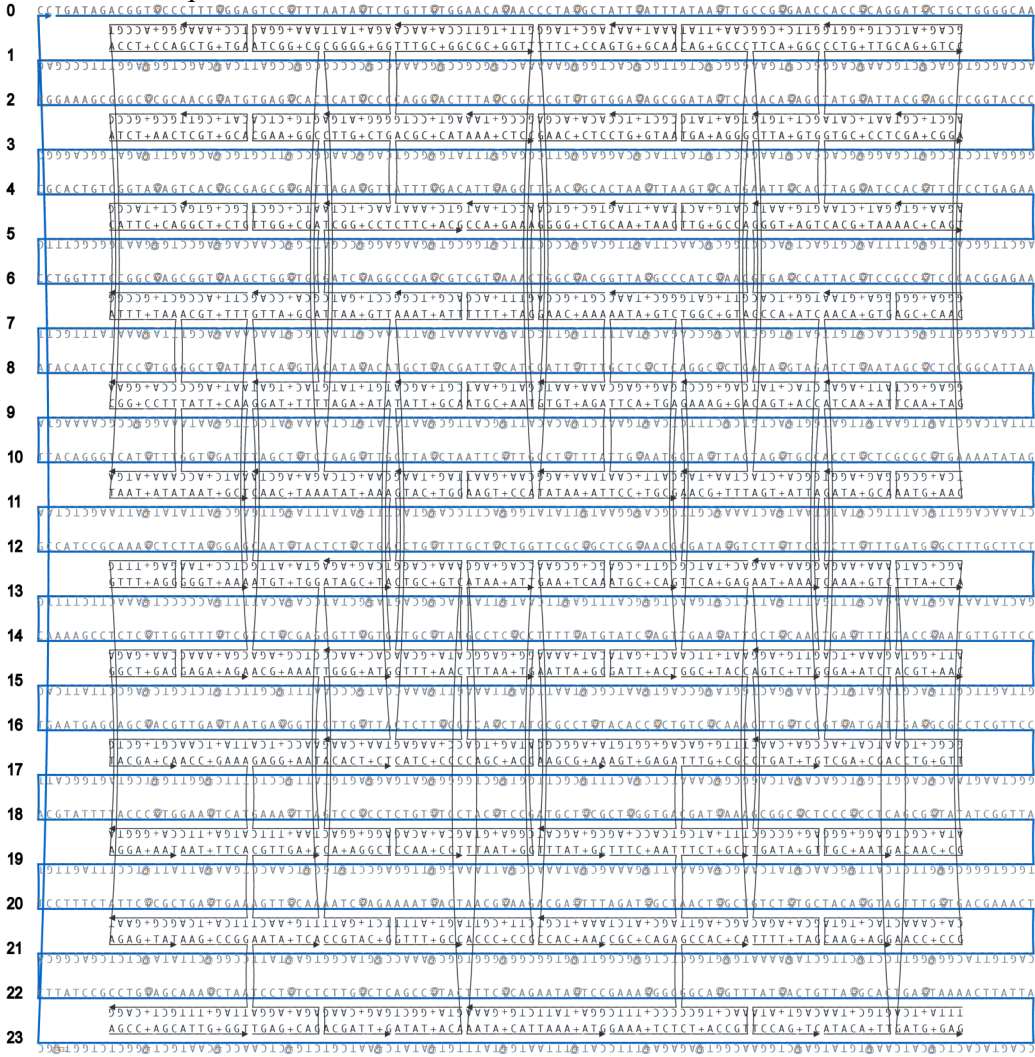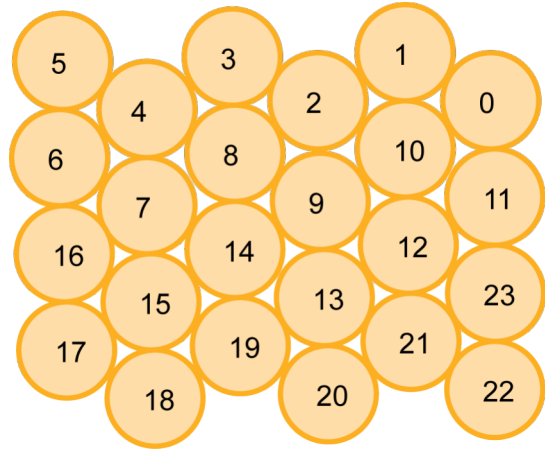

**Figure S11.** Illustration of 24HB-S design. Blue strand is the scaffold strand and black strands are staple strands. Arrows indicate 3'-end of DNA.

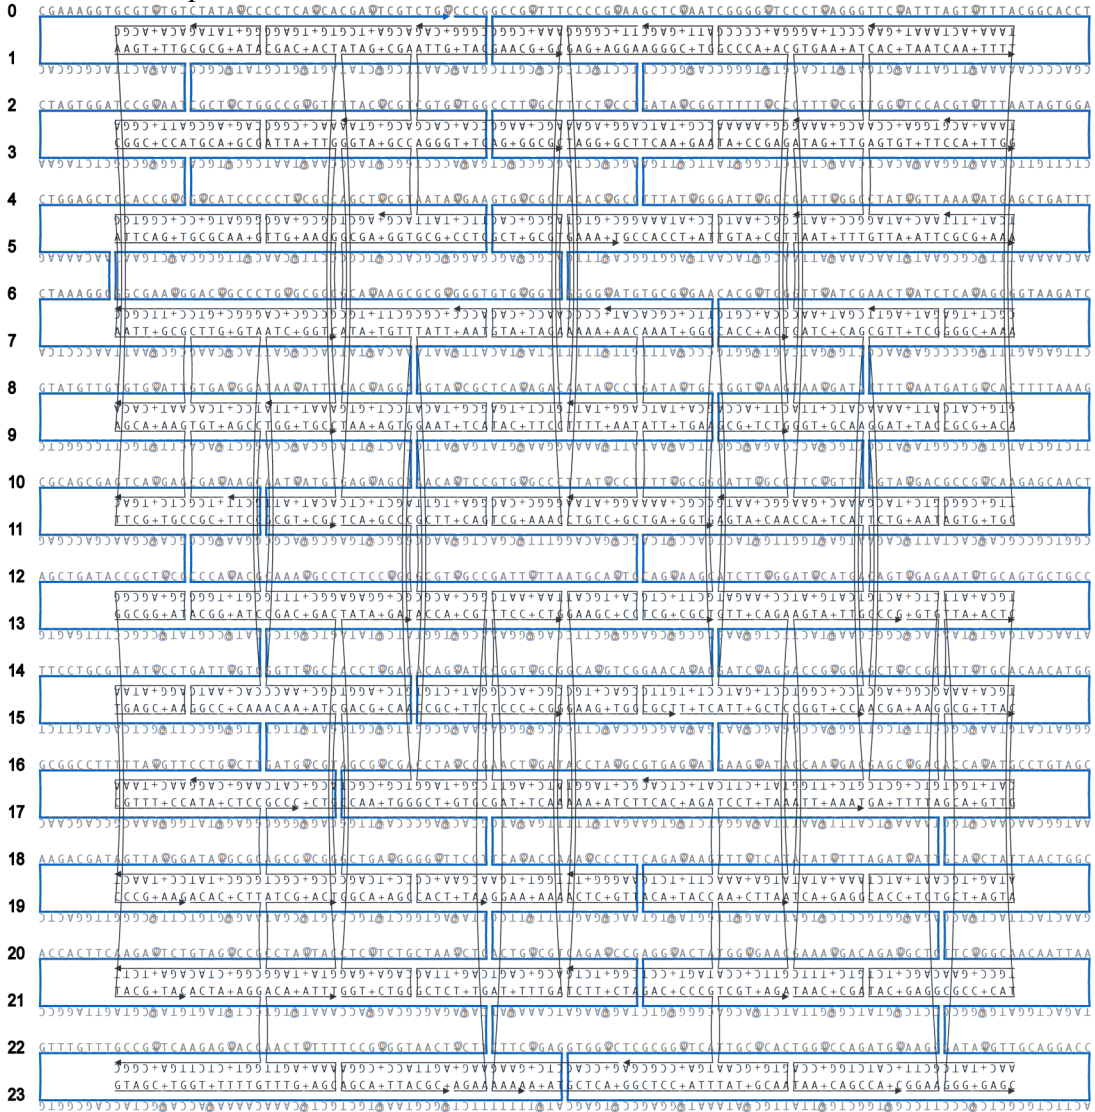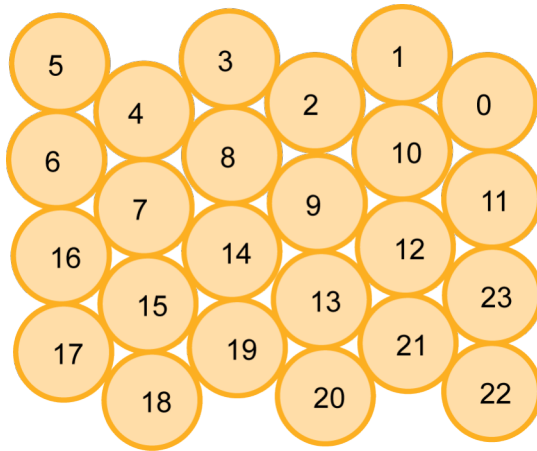

**Figure S12.** Illustration of 60HB-S design. Blue strand is the scaffold strand and black strands are staple strands. Arrows indicate 3'-end of DNA. Strands colored in green or red are used for incorporation efficiency assay in Figure S15.

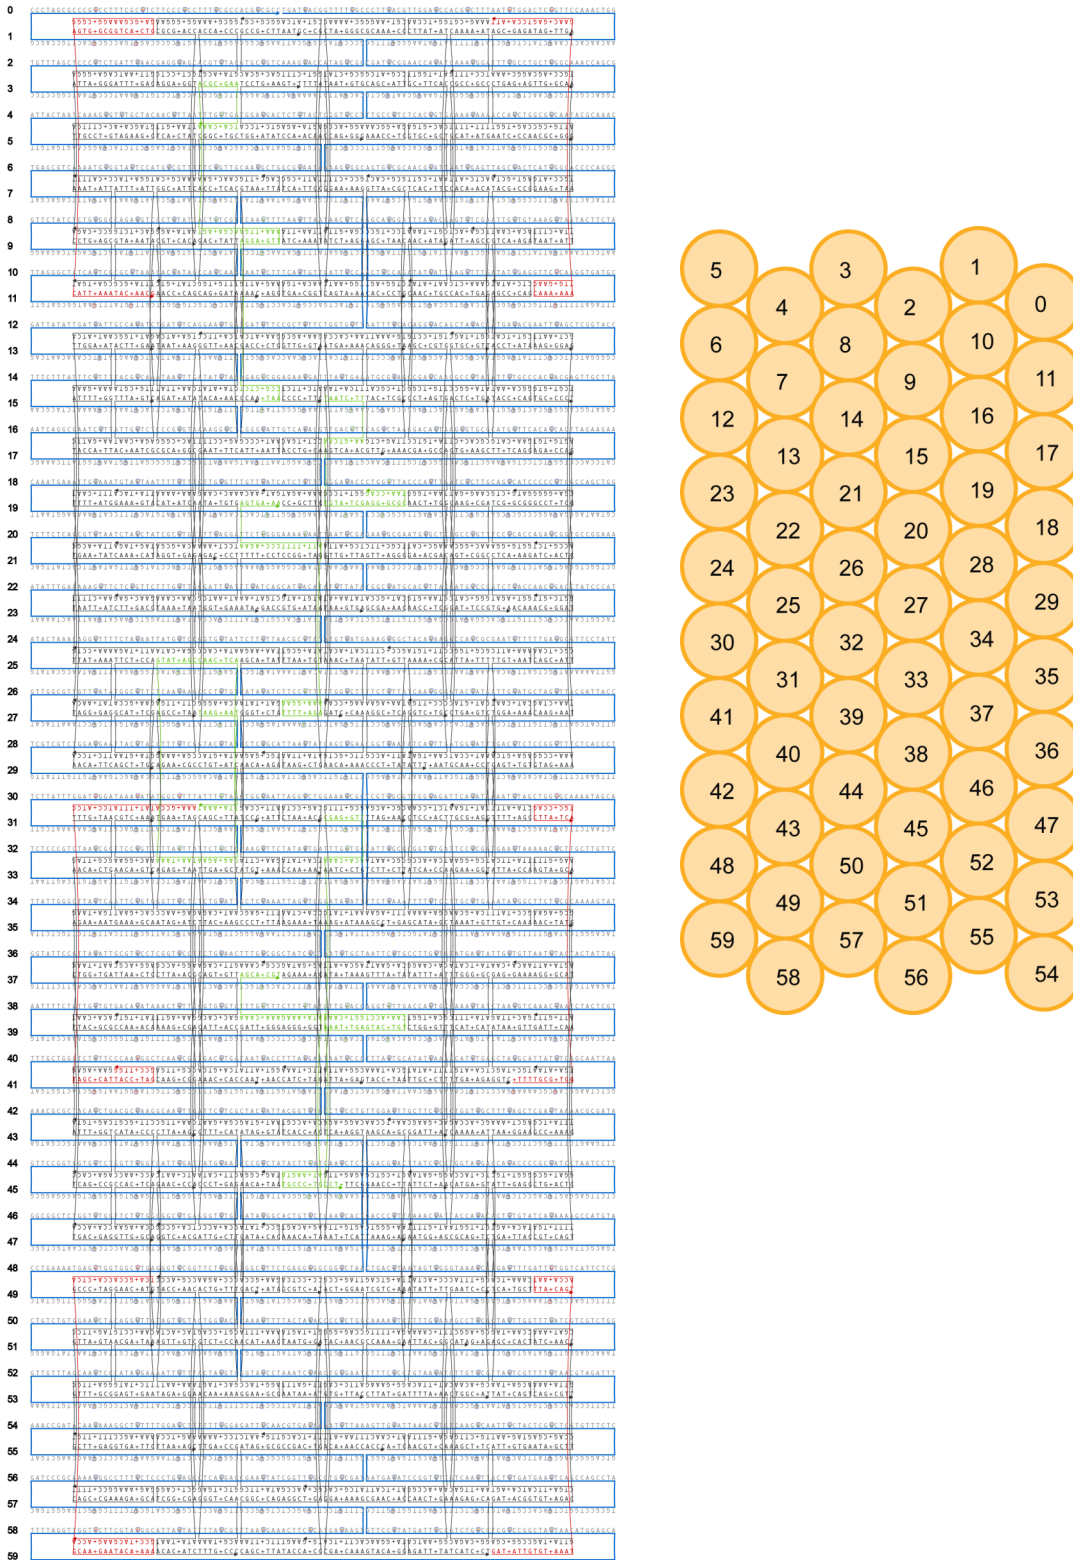

**Figure S13.** Illustration of 56HB hybrid design. Blue strand is the scaffold strand and black strands are staple strands. Arrows indicate 3'-end of DNA.

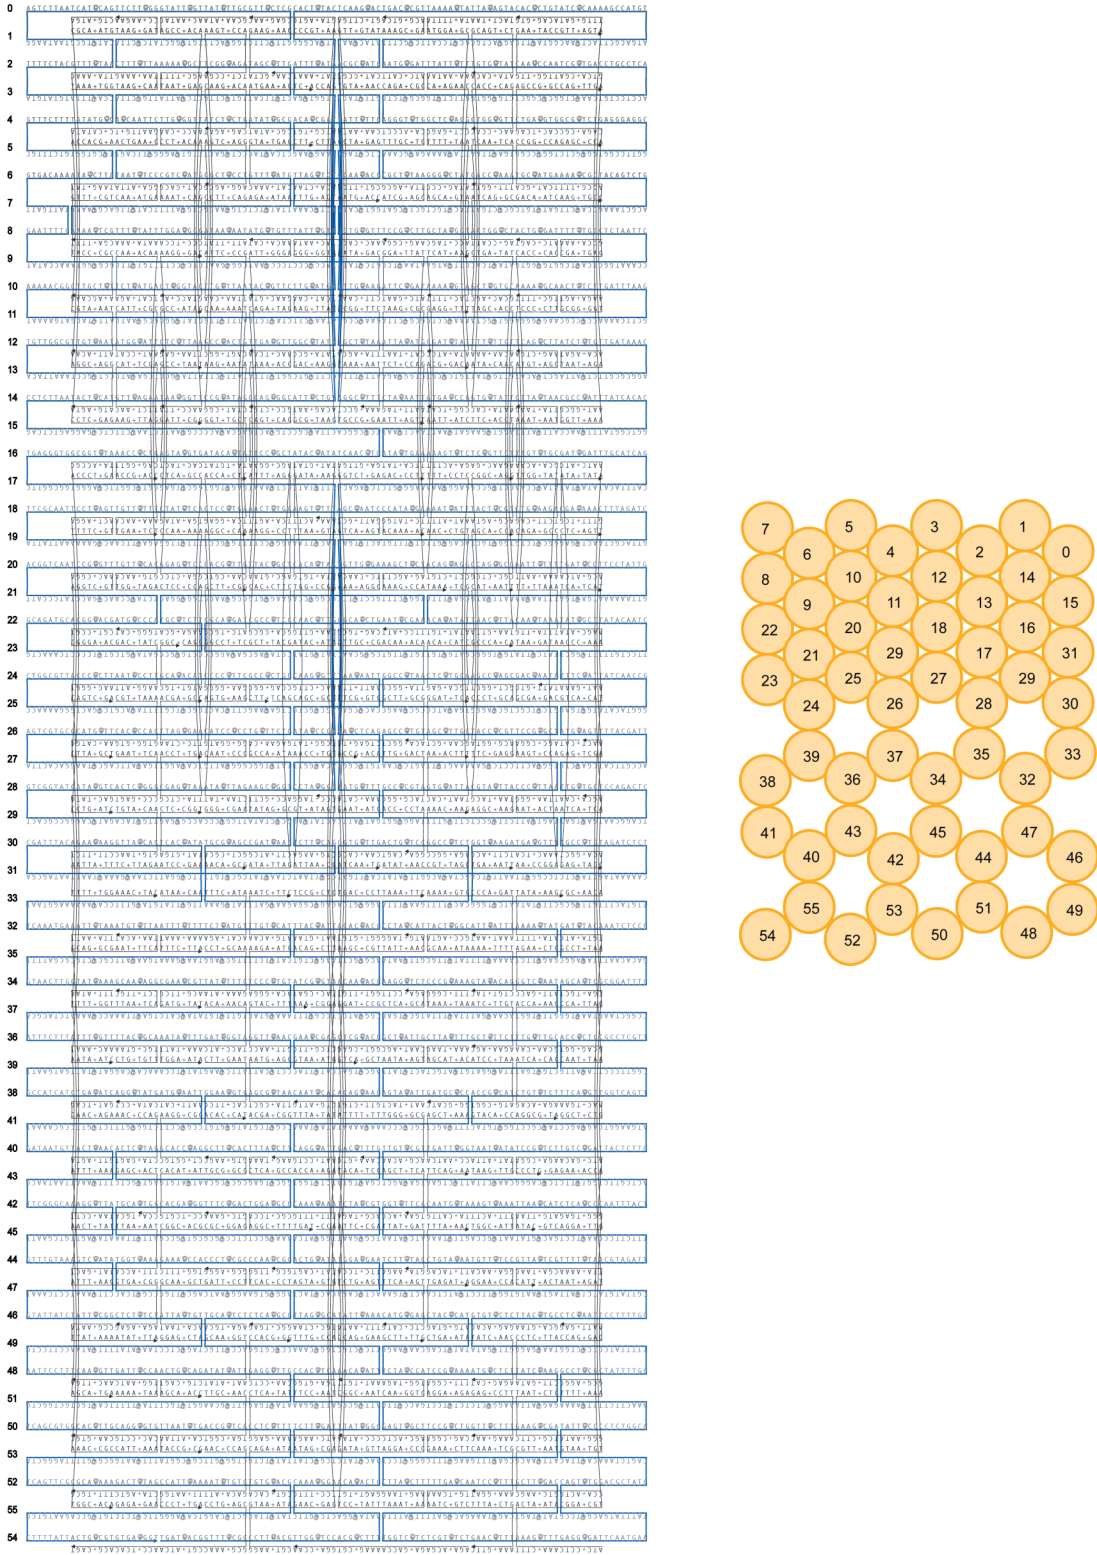

**Figure S14.** Illustration of 52HB hybrid design. Blue strand is the scaffold strand and black strands are staple strands. Arrows indicate 3'-end of DNA.

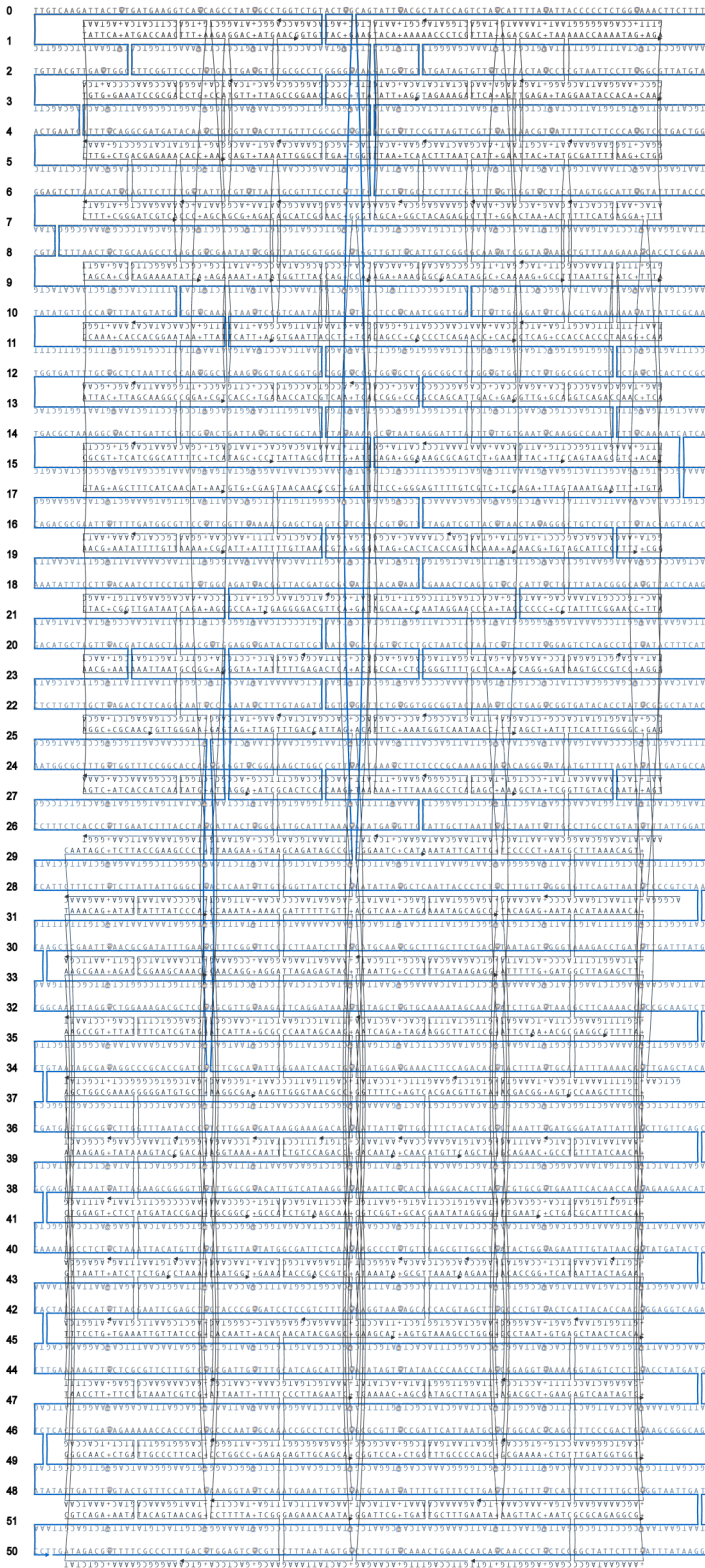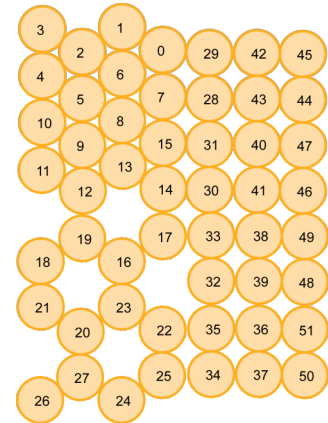

**Figure S15.** Explanation of the different stripe patterns of honeycomb-lattice, square-lattice and hexagon-lattice in TEM images. An 18HB honeycomb-lattice, a 20HB square-lattice and a 24HB hexagonal-lattice are used as examples for the three lattices. The red arrows point to the positions where stripes can be observed.

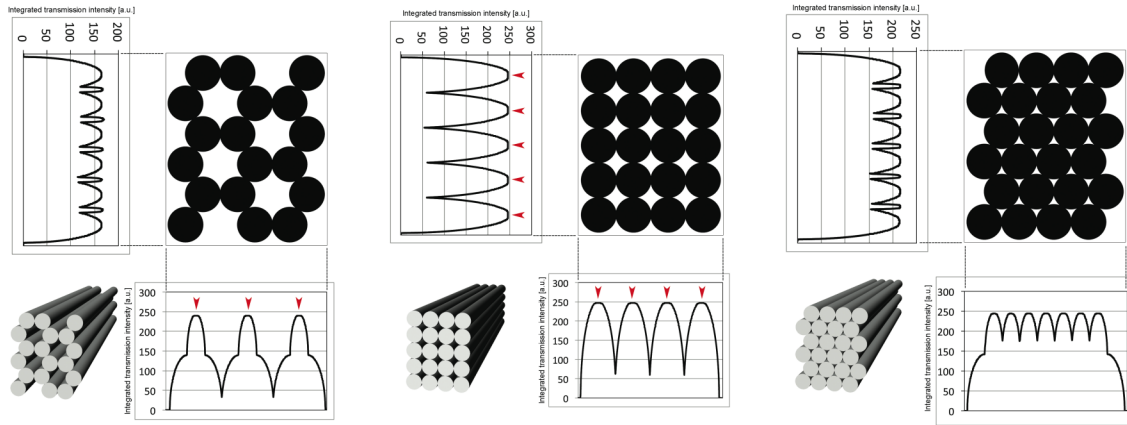

**Table S1.** Sequence of 12HB-L staple strands

|    |                                          |
|----|------------------------------------------|
| 1  | CTTTCGGCACCGCTTCTGGTGCCGG                |
| 2  | AGCCGCCGCCAGCATTGACAGGAGGT               |
| 3  | GGCGAAAAACCGTTAATTGCTGAATAAATGCTGTAGCT   |
| 4  | AGCCCGAGATAGGTATAACAGTTGATTCCAATTCTGCG   |
| 5  | ACCTGTGCTGCCAGCTGCATTAATGATCCAACGTCAAAG  |
| 6  | TTTCTTTTACCAGTGAGACGGGCAAAAATCAAAGAAT    |
| 7  | GGGCTCACTGCCCGGGAGAAGCCTTAAAAACATTATGA   |
| 8  | GTGAGCTAACTCACGAATATAGGGGTACCCCGTTGAT    |
| 9  | AGTGTAAGCCTGTTTGCGTATTGGGCGCCAGGGTGTT    |
| 10 | ACACAACATACGAGTGTAGGTAAAGATAAATCATAACGG  |
| 11 | TGAAATTGTTATCTGAGTAAACAGGGCAGGTCAATGCCT  |
| 12 | AATCATGGTCATACCTGAGAGAGTTGCAGCAAGCGGTCC  |
| 13 | ATCTGTAAAGCAACTCGTCGGTGGGCACATTAATTGCGTT |
| 14 | GAACTCTGACCTCCTGGTTGGTGAACGCTACAATTCC    |
| 15 | CTCTATGATACCGATTTAAATTGTAACAAAAACAGGAA   |
| 16 | ATCTATTTACGCTTTGGGAAGGGCAGCACTCCAGCCAG   |
| 17 | GTCCCGCCAAAATACGCATTTACATAAAATCAATTTCTCC |
| 18 | TGCTGAATTGTCAGAACGCCATCAAAAAACAAGAGAATC  |
| 19 | GATGTTCTTCTAAGTGCTTGTACC TCGATAAAGACGGA  |
| 20 | CATTGCGCATTACAGGCTGCGCAACTGCGCCCTGGAGTGA |
| 21 | CCTCAGGAAGATCTCGGTGCGGCCCTTTCGCTATTACG   |
| 22 | GGGAACAAACGGCAGCGAGTAACAACAGAAGCCAGGGTG  |
| 23 | TGTCAATCATATGCTTGAATCGGCTGAACCCCGCTTCTA  |
| 24 | GATGAACGGTAATATGCCTGAGTAATGCCGGAAGCATAA  |
| 25 | CTACAAAAGGCTATCTTAAGCTACGTGGTGGTTGTGAATT |
| 26 | GGAGAGGGTAGCTTCAACCGTTCTAGAGCTCGAATTCGT  |
| 27 | CAATAAAGCCTCACGGGGAGAGCGGGGGTGCCTAATGA   |
| 28 | GGCATCAATTCATTACCGCCTGGCGCTGTTTCTGTG     |
| 29 | CAACATGTTTTAAATATGCAACTAAATCAGGATTAGAGA  |
| 30 | AACGAGTAGATTTAGTTTACCATTAGGAAGCCCGAAAG   |
| 31 | GTTTTGCCAGAGGGAGGTCATTTTTGAGAGGGTTGATAT  |
| 32 | ATGTTTAGACTGTTGCTAAACAACTCGTTGAAAATCTC   |
| 33 | GAATCCCCTCAAGCTTCAAGCGAACCACCTCAGAAC     |
| 34 | TTCAGAAAACGAGAGCCCTCATAGTTTTCTTAAACAGCT  |
| 35 | GGCTTGCCCTGACAAAATAGCGAGAAGGAATTGCGAAT   |
| 36 | AATTACCTTATGCCATAACGCCAAAATTTATCAGCTTGC  |
| 37 | ACCTAAAACGAAAATGAGGAAGTTTCCATTAACGGGTA   |
| 38 | AGTACAACGGAGATCACCTCAGCAGCGAAAAGACAGCAT  |
| 39 | CGGAACGAGGGTAGCAACGCTACAGCCAAAAGGAGCCT   |
| 40 | ATATTCGGTCTGCTGAGGCTTGCAGGGTGCGCCGACAATG |
| 41 | AATAATTTTTTTCATTCAACAGTTTACGCGAGTGAGAAT  |
| 42 | CAAAAAAAGGCTAGGCTTTGAGGACTGGGCTTGAGATG   |
| 43 | TTAATTGTATCGGGGAATTACGAGGCATAAAATATTCAAT |
| 44 | TTTCGAGGTGAATAGCGTAACGATCTAAAGTTTTGTCTG  |
| 45 | TGATACCGATAGTAGTTAAAGGCCGAGTCAGGACGTTG   |
| 46 | ACAACAACCATCGATTATTACAGGTATTACCTGACTA    |
| 47 | CTTTCAGACGTTAGTAAATGAATTTGTTTAGTACCGCC   |
| 48 | CACCAGTACAAACTACAACGCTGTACAAGCCAATAGG    |
| 49 | AAGTATAGCCCGTTAGCGGGTTTTGCTCAGTACCAGG    |
| 50 | CCGTA CTAGGAGTCTGTATGGGATTATAGCGTCCAATA  |
| 51 | TTTTCAGGGATAGGCATTCACAGACAATGACCATAAAT   |
| 52 | AACCCATGTACCGAGCGGATTGCATCGATGATACAGGAG  |



|    |                                                       |
|----|-------------------------------------------------------|
| 53 | GTATTAAGAGGCTGAGACTCCTCAAGACGATTGGCCTTG               |
| 54 | TGAGGCAGGTCAGAGAAGGATTAGGAAATAGGTGTATCA               |
| 55 | AGAGTCCACTATTTAAAGAACGTGGACATCGGCCAACGCGGAGCATAAAGCTA |
| 56 | GTTCCGAAATCGGCAAAATCCCTTATCAGCTGATTGCCCTAATAGTAGTAG   |
| 57 | CATGCGCACGACTTTGGGTAACGCCAGTTGGTGTAGATGGGCGCATCGTAAC  |
| 58 | CCAGCTGGCGAAAGGGGATGTGCTGCAAGGCGATTAAGTAAGTGCCTTAG    |
| 59 | CGTGCATCTGCCAGTTTGAGGGGACGTTTTAACCAATAGACCTTATGACAAT  |
| 60 | TGGGATAGGTCACGGGTTTTCCAGTCACGACGTTGTAAAACGACGGCCAGT   |
| 61 | AATCAGAAAAGCCACGTTAATAATTTTCGACGATAAAAACGAGAAACACCAGA |
| 62 | GAGAGTCTGGAGCAATAATTCGCGTCACTAATGCAGATAGATTTTAAGAACT  |
| 63 | AATCGGTTGTACCTATTTCAACGCAACTCCTTTTGATAAGGGTAATAGTAAA  |
| 64 | CAAGGCAAAGAATAAGTTTCATTCCAGTTGAGTGTGTTCCAGTTTGAACA    |
| 65 | CATTAACATCCAATTCAAAAGGGTGACGTTTTAATTCGAATGCTTTAAACAG  |
| 66 | TCATTTGGGGCGCAATGGTCAATAACGCAGGCGAAAATCCTGTTTGATGGTG  |
| 67 | GTACCTTTAATTGGGATAAAAATTTTGTAGAACCTCATACACTATCATAACC  |
| 68 | ACTTCAAATATCGGAAAGGCCGGAGACAGTCAAATCACCGTTGAGATTTAGG  |
| 69 | CTGCGGAATCGTCATAGTAAGAGCAATTTTTAAATGCACGTAAAAC TAGCA  |
| 70 | CAAAAATCAGGTCGAAAGATTCATCAATCAATATGATATATTTTTGAGAGAT  |
| 71 | CTCGTTTACCAGAGTTAAAATTCGCATTAATTTTTGTTAATCTTGACAAG    |
| 72 | AATACCACATTATGGCCTTCCTGTAGCCAGCTTTCATCCGAACTGACCAAC   |
| 73 | ACGAGTAGTAAATTAAGACTTTTTCGAGGCAAAAAGAATACACTAAAACACT  |
| 74 | GTTTAATTTCAACCCTTCATCAAGAGAAATCAGCTCATTACGACAGTATCGG  |

**Table S2.** Sequence of 24HB-L staple strands

|    |                                           |
|----|-------------------------------------------|
| 1  | CTTTCCGGCACCGCTTCTGGTGCCGG                |
| 2  | AGCCGCCGCCAGCATTGACAGGAGGT                |
| 3  | GGCGAAAAACCGTTAATTGCTGAATATAATGCTGTAGCT   |
| 4  | AGCCCGAGATAGGTATAACAGTTGATTCCCAATTCTGCG   |
| 5  | ACCTGTCGTGCCAGCTGCATTAATGATCCAACGTCAAAG   |
| 6  | TTTTTTTTACCAGTGAGACGGGCAAAAATCAAAGAAT     |
| 7  | GCGCTCACTGCCCCGGGAGAAGCCTTAAAAACATTATGA   |
| 8  | GTGAGCTAACTCACGAATATAGGGGCTACCCCGTTGAT    |
| 9  | AGTGTAAGCCTGTTTGCCTATTGGGCGCCAGGGTGGTT    |
| 10 | ACACAACATACGAGTGTAGGTAAAGATAAATCATACAGG   |
| 11 | TGAAATTGTTATCTGAGTAAACAGGGCAGGTCATTGCCT   |
| 12 | AATCATGGTCATACCTGAGAGAGTTGCAGCAAGCGGTCC   |
| 13 | ATCTGTAAGCAACTCGTCGGTGGGCACATTAATTGCGTT   |
| 14 | GAACTCTGACCTCCTGGTTGGTGAACGCTACAATTCC     |
| 15 | CTCTATGATACCGATTTAAATTGTAACAAAAACAGGAA    |
| 16 | ATCTATTTACGCTTTGGGAAGGGCGAGCACTCCAGCCAG   |
| 17 | GTCCCGCCAAAATACGCATTTACATAAAATCATTTCTCC   |
| 18 | TGCTGAATTGTCAGAACGCCATCAAAAAACAGAGAATC    |
| 19 | GATGTTCTTCTAAGTGCTTGTACCCTCGATAAAGACGGA   |
| 20 | CATTTCGCATTACAGGCTGCGCAACTGCGCCCTGGAGTGA  |
| 21 | CCTCAGGAAGATCTCGGTGCGGGCCTCTTCGCTATTACG   |
| 22 | GGGAACAACGGCAGCGAGTAACAACAGAAGCCAGGGTG    |
| 23 | TGTCAATCATATGCTTGAATCGGCTGAACCCCGCTTCTA   |
| 24 | GATGAACGGTAATATGCCTGAGTAATGCCGGAAGCATAA   |
| 25 | CTACAAAAGGCTATCTTAAGCTACGTGGTGGTTGTGAATT  |
| 26 | GGAGAGGGTAGCTTCAACCGTTC TAGAGCTCGAATTCGT  |
| 27 | CAATAAAGCCTCACGGGGAGAGCGGGGGTGCCTAATGA    |
| 28 | GGCATCAATTCATTACCGCCTGGCGCTGTTTCTGTG      |
| 29 | CAACATGTTTTAAATATGCAACTAAATCAGGATTAGAGA   |
| 30 | AACGAGTAGATTTAGTTTGACCATTAGGAAGCCCGAAAG   |
| 31 | GTTTTGCCAGAGGGAGGTCATTTTTGAGAGGGTTGATAT   |
| 32 | ATGTTTAGACTGGTTGCTAAACAACTCGTTGAAAATCTC   |
| 33 | GAATCCCCCTCAAGCTTCAAGCGAACCACCCTCAGAAC    |
| 34 | TTCAGAAAACGAGAGCCCTCATAGTTTTCTTAAACAGCT   |
| 35 | GGCTTGCCCTGACC AAAATAGCGAGAAGGAATTGCGAAT  |
| 36 | AATTACCTTATGCCATAACGCCAAAATTTATCAGCTTGC   |
| 37 | ACCTAAAACGAAAATGAGGAAGTTTCCATTAACGGGTA    |
| 38 | AGTACAACGGAGATCACCCCTCAGCAGCGAAAAGACAGCAT |
| 39 | CGGAACGAGGGTAGCAACGGCTACAGCCAAAAGGAGCCT   |
| 40 | ATATTCGGTTCGCTGAGGCTTGCAGGGTGCGCCGACAATG  |
| 41 | AATAATTTTTTCATTCAACAGTTTCAGCGGAGTGAGAAT   |
| 42 | CAAAAAAAGGCTAGGCTTTGAGGACTGGGCTTGAGATG    |
| 43 | TTAATTGTATCGGGGAATTACGAGGCATAAAATATTCATT  |
| 44 | TTTCGAGGTGAATAGCGTAACGATCTAAAGTTTTGTCTG   |
| 45 | TGATACCGATAGTAGTTAAAGGCCCGAGTCAGGACGTTG   |
| 46 | ACAACAACCATCGATTATTACAGGTATTTACCTGACTA    |
| 47 | CTTTCCAGACGTTAGTAAATGAATTTGTTTAGTACCGCC   |
| 48 | CACCAGTACAAACTACAACGCCTGTACAAGCCCAATAGG   |
| 49 | AAGTATAGCCCGTTAGCGGGGTTTTGCTCAGTACCAGG    |
| 50 | CCGTACTCAGGAGTCTGTATGGGATTATAGCGTCCAATA   |
| 51 | TTTTCAGGGATAGGCATTCACAGACAATGACCATAAAT    |
| 52 | AACCCATGTACCGAGCGGATTGCATCGATGATACAGGAG   |

|    |                                                       |
|----|-------------------------------------------------------|
| 53 | GTATTAAGAGGCTGAGACTCCTCAAGACGATTGGCCTTG               |
| 54 | TGAGGCAGGTCAGAGAAGGATTAGGAAATAGGTGTATCA               |
| 55 | AGAGTCCACTATTTAAAGAACGTGGACATCGGCCAACGCGGAGCATAAAGCTA |
| 56 | GTTCCGAAATCGGCAAAATCCCTTATCAGCTGATTGCCCTAATAGTAGTAG   |
| 57 | CATGCGCACGACTTTGGGTAACGCCAGTTGGTGTAGATGGGCGCATCGTAAC  |
| 58 | CCAGCTGGCGAAAGGGGATGTGCTGCAAGGCGATTAAGTAAGTGTCCCTTAG  |
| 59 | CGTGCATCTGCCAGTTTGAGGGGACGTTTTAACCAATAGACCTTATGACAAT  |
| 60 | TGGGATAGGTCACGGGTTTTCCAGTCACGACGTTGTAAAACGACGGCCAGT   |
| 61 | AATCAGAAAAGCCACGTTAATAATTTTCGACGATAAAAACGAGAAACACCAGA |
| 62 | GAGAGTCTGGAGCAATAATTCGCGTCACTAATGCAGATAGATTTTAAGAACT  |
| 63 | AATCGGTTGTACCTATTTCAACGCAACTCCTTTTGATAAGGGTAATAGTAAA  |
| 64 | CAAGGCAAGAATAAGTTTCATTCCAGTTGAGTGTGTTCCAGTTTGAACA     |
| 65 | CATTAACATCCAATTCAAAAGGGTGACGTTTTAATTCGAATGCTTAAACAG   |
| 66 | TCATTTGGGGCGCAATGGTCAATAACGCAGGCGAAAATCCTGTTTGATGGTG  |
| 67 | GTACCTTTAATTTGGGATAAAAAATTTTAGAACCTCATACTATCATAACC    |
| 68 | ACTTCAAATATCGGAAAGGCCGGAGACAGTCAAATCACCGTTGAGATTTAGG  |
| 69 | CTGCGGAATCGTCATAGTAAGAGCAATATTTAAATGCACGTAACACTAGCA   |
| 70 | CAAAAATCAGGTCGAAAGATTCATCAATCAATATGATATATTTTGAGAGAT   |
| 71 | CTCGTTTACCAGAGTTAAAATTCGCATTAATTTTTGTTAATCTTGACAAG    |
| 72 | AATACCACATTTCATGGCCTTCTGTAGCCAGCTTTCATCCGAACTGACCAAC  |
| 73 | ACGAGTAGTAAATTAAGACTTTTTTCGAGGCAAAAAGAATACACTAAAACACT |
| 74 | GTTTAATTTCAACCCTTCATCAAGAGAAATCAGCTCATTACGACAGTATCGG  |
| 75 | GGCTCATTATACCTTTTGCGGGATCGTTTGTATCATCGCCTGATAAATTGTG  |
| 76 | GGAAGAAAAATCTATCATAAGGGAACAACATTAATGTGGGATTGACCGTAA   |
| 77 | AACCGGATATTCATTACCCAAATCAACGTAACAAAGCTGTACGAAGGCACCA  |
| 78 | TTTGAAAGAGGACAGATGAACGGGTACAGACCAGGCGCAAGCGGAAACAA    |
| 79 | CATCTTTGACCCCGAGGATTATACCATAGGCTGGCTGATTTAATCATTGTG   |
| 80 | TCGAAATCCGCGACCTGCTCCATGTTGCGCAGACGGTCAACGTTAATAAAAC  |
| 81 | ACCTCAGAACCGCCAGACCAGGAAAGCAATAAATCCTCATTAAAGCCAGAATG |
| 82 | CGCCACCCTCAGACCCTGCCTATTTTCGGAACCTATTATCTGAAACATGAAA  |
| 83 | TTTAACGGGGTCAGTGCCTTGAGTAACAGTGCCCGTATATCCAGTAAGCGTC  |
| 84 | ATATTCACAAACAAAACCTCAACAGGGTACGGTGTCTGGTAGCAAAATTAAG  |
| 85 | GAAAGCGCAGTCTCTGAATTTACCGTAACAGTTAATGCCGCCACCACCTCA   |
| 86 | ATACATGGCTTTTAAAAAGATTAAGAGATACATTTTCGACAGCTGAAAAGGT  |

**Table S3** Sequence of 24HB-S staple strands

|    |                                                         |
|----|---------------------------------------------------------|
| 1  | TTGACGGGGCTGTCGTGCTGACTGGTG                             |
| 2  | AAGTCATTGCGCGTAATAGGGCTATAG                             |
| 3  | GAGAAAGGAAGGGCGATGATTTAGAGC                             |
| 4  | AACGACGGCATTAAAGTTGAAATTGTTA                            |
| 5  | TGGACTCCACACCCTAATCAAGTTTTT                             |
| 6  | AACCAATAGAGTGTGTTCCAGTTTGG                              |
| 7  | CGCTGTTGAGGGCGAAAATCATTTTTT                             |
| 8  | GTGCTCATCCGCGCCACATAAAGAACG                             |
| 9  | GGCGGTAATGGCGAGCGGTACGGCTAC                             |
| 10 | GTTGTCAGAGTTCATCCAAATGCTTAA                             |
| 11 | TGAGCAAAAAGGGGATAACCCGGTAAG                             |
| 12 | TGGTCATGAACGAACCCCCACTGGTAA                             |
| 13 | ACACGACTTCGGTGCTACAGAGTTC TT                            |
| 14 | GGAACGAAACGCTTACCGTTCCCCCTG                             |
| 15 | TCAGTGAGGAAAGTATATCGGTTCCCA                             |
| 16 | ACTAGAAGGGGTAGCTCTTGATCCGGC                             |
| 17 | GGTATCTGCCAGAGCGAGTATAAAGAT                             |
| 18 | TAACTACGAGTCTATTTACAGTAAGTTGGCCG                        |
| 19 | ACAATACGCTTCGGCTGCCGCTCTTCCGCGTTGCGC                    |
| 20 | CCCTAAAGGGAGCCCCGGCCACTACGGCAAAATG                      |
| 21 | CGATGTAACATAATTTTGTAAAATTCGCGTTAAA                      |
| 22 | ATAGCTGTTTCGTTTCGCTACGAGCATCAAGGCCAGG                   |
| 23 | GATCTTCAGGTCGTTTGGTATGGCTTCATAGCTCAC                    |
| 24 | TAATGAGTGGTCAGAGGTGGCGAAACCATCATGGTC                    |
| 25 | GGTGAGCAATCCTTCGGTCTCCGATCCACCCAAT                      |
| 26 | GGGCGACACTCGGAAACAAGCCGGCCGGGGTCAG                      |
| 27 | CCGCAAAAATTAATTGAAGCTTTTCGTGCTGCGCT                     |
| 28 | TTGCCCGCAGTGATGCTAAAGCACTAAATCGGAA                      |
| 29 | TCACTGCCCGGGGAGAGGCGGTTTGGGGGTGCC                       |
| 30 | ACGATCAAGGTCACGCTCCGTTCTTCGGATCCAGTT                    |
| 31 | GAAGTTTTAGCAACGTTGCATCGTGGTGCGAGTTAC                    |
| 32 | ACGAATTCGTGGCTGAGGCGACTCACTACATTAATTGCTT                |
| 33 | GGCAAAATCTGTAAGCGTCCACTCGTGTCCGCGCACATTT                |
| 34 | TTCTCATTACGCTCATGAGTAAATCCTTTTAAATTAATAAAT              |
| 35 | AACTTTATCGCTTACCATCTGGCCCCATAAACCAGCCAGCC               |
| 36 | AGTACTCAACCAAGTCATTCATGCCATCCGTAAGATGCGTTTCTG           |
| 37 | AACCGTAAACGTTTTTCCATAGGCTCCGCGCCTTATCCGGTAACT           |
| 38 | GCTGTAGGTAAAGGATCTTCACCTAGACTTGGTCTGAAGGGATTT           |
| 39 | GTAGCGGTGGTTTTTTTGTGTTGCAAGCAAAAAGAGTTACAGTATTT         |
| 40 | GCCACCTAAATCC TTATAAAGGCAAGTGTAATAAACCAGGGTTATT         |
| 41 | GAAGCTCCCCAGCTGCATTTCTTTTC TAGACTCCCCGTGATACCGCGA       |
| 42 | GCCGCGCTTAATGCGCGATCGGTGCGGGCCTCGCTGCGCGTGAAAAGT        |
| 43 | GACCCACCTCAAGAAGAAGCCAGTTACCTTCGGAAGCAGATTACGCGC        |
| 44 | AGCTGGCGAAAAGTTGGGAAGGGCCGCTACAGGGCGCGTCCATTGCGC        |
| 45 | ACGCTCAGTCAGGATTAGGCTCTGTGATCC TTTGATAATGAATCAAAA       |
| 46 | CCCTGCCAAGCTGGGCTGTGTGCGATTATCAAATCTCAGTTTCCCTTCGG      |
| 47 | AGGATGCTCACCGGCTCCAGATTTATCAGCAAGTGCTGCAATCGGTAGA       |
| 48 | CGGCCGCGCATGAAGGCGCAGTGAGCGATTTACGGAAGCATAAAGCTCACTGAC  |
| 49 | TAGGGCGCTTCAAAGAACCCTCTATCAGGAAGAATTTTTCAATAGGGAATAA    |
| 50 | ATTCAGGCTGCGCAACTGGGGATGTGCCCGGGTGGAAATTGCGCGAATTCACA   |
| 51 | GTCTCATGATACTCTTCCAGCGAAAAGGCCAGTCACGATTGGGTACGAACGTGGC |
| 52 | GAAGCGTGGCGACCCTGCACTCACGTTACAGTTACCTAGTTGCCCTCGGGTCTG  |

|    |                                                             |
|----|-------------------------------------------------------------|
| 53 | ATAGTTTGCAATCAATCTCACCTATCTGCTAGAGTATGCAAAAAATTATCACTC      |
| 54 | TGCCGGGAACAGCGATCTTACGGGAGGCGCCTCCATTGCATAATTGGGCCGAGC      |
| 55 | GGCGAAAAATAGACCGAGCTTTCACCAGCATTATCAAATAGGGGCTCCTGTTCCGCT   |
| 56 | CCCCAACCACCACGTATTTAGAAGCGGTCACTTCGCTATTAGGGTTTTAGCGGGCGC   |
| 57 | TCCGCTCACCTTGGCGTACACAGAATCGGCCAGCAAACAAAAATCCCGACCGCTGCC   |
| 58 | GGCAGCAGCCCGTTCAGCGACGCTCAACCGCCTTTCGGGTAGGTATTTGAATACCC    |
| 59 | AGAAGGCCAACGCGCTTTCAGGGAAATGTTAGCTAACTCATAGGGCGAACGTTGTAA   |
| 60 | GGAACTCTTACTGTCTGAGAATGTCAATACGAAACAGGAAGTGAACCATACGTCAAAG  |
| 61 | CCTCGTGTAAGCCCGTATTGGGACGGTTATCCGACAGGACGTATGTAGGATCGCCACT  |
| 62 | ACCAGGCGTGATACCTGTGAATACTCAGCGGATACATCCTGTGTGGGTAACGCCACGCC |
| 63 | CAGTGGCGGTTAGCGGATAATACATTGGAAAACATCTTTAATAGGGTTGGCCGAAATC  |

**Table S4.** Sequence of 60HB-S staple strands

|    |                                        |
|----|----------------------------------------|
| 1  | GCTTTCCTCAGGAACGGTAATAAAAAGG           |
| 2  | ATGGTGGTTGCCCTTCACCGTATTTAAA           |
| 3  | CAAACCTCCAAAAGAATTCCTGTTTG             |
| 4  | TTTAACAATAACATGTTTCAGCTAATGC           |
| 5  | TTAAGACGCTAGGCAGAGTTCTGTCCA            |
| 6  | AAAACTTTTTTATACAAATATTTAACA            |
| 7  | CGCCATCAACAGCTCATTGGTCACGTT            |
| 8  | TAAAACTAGCAAGAGAATACCGTTCT             |
| 9  | AATAATAACTGACAGGAGTTGAGGCA             |
| 10 | AGCAAAATTAATCCTCATTAAAGCCAG            |
| 11 | ACAATCAATTCAGAGCCGCCACCACCA            |
| 12 | GAATTAGAGATTTTCGGTAGAGCCACC            |
| 13 | TTTAATTCGGCCCGAAAAGTGAATATAA           |
| 14 | GTTTGCCATCCCTCAGAACCGCCACCC            |
| 15 | CAAAAAGATGGTCTTTACCCTGACTAT            |
| 16 | GGATTAGCGCTGAGACTCATTTAGTTT            |
| 17 | GGTTTTCCCAACAAGAAACCTCATATATT          |
| 18 | GACCGTGTGATAAGAAGGAGCGTTGGTGTA         |
| 19 | ACAAACGGCGGATGCTCGAATTAAGACGGAG        |
| 20 | AAAGGCCGGGTAGGTA AACGAAAGGGGGATG       |
| 21 | TTTTGATGACGTTCCAGTAGTAGCATTAAACA       |
| 22 | TACATAACGATTCATCAGACAACAACCACCC        |
| 23 | GAAACCATCGATAGCAGAGCCTACTAAGAACG       |
| 24 | ATTTTTGCGGATGGTGCACCCAGCTTAAATCA       |
| 25 | GGCGAGAAAGGAAGGGAACGCGTAACCCATTAGTC    |
| 26 | AAAGAACGTGGACTCCAAC TTATAAATAATCAATAT  |
| 27 | ACTCACATTGCATTAATGAATCGGCCAACGCGCGGG   |
| 28 | GACATTCTGATTTACATTTTGCACGTAACCTCTGAA   |
| 29 | TCCTTTGCCGTTATCCGCC TGACGCATCAGGGCTTA  |
| 30 | TTTAATGCGGTAAGAATAAGAAACAATTTTAACGTC   |
| 31 | AACAGTTGATGAGGCGGTCGTCTATCAGGCGAACGT   |
| 32 | CTGGTCAGTAGCACTAACTTAGTGCTGTACGCTCGC   |
| 33 | TTGCTGAACCAAATGAAAGAACAAGAGTCCACTATT   |
| 34 | TGTTTCTGTGTGAAATTA AACCAACATAAAATGTGA  |
| 35 | ACCTCGATACGTAATCATTACGAGCCGAGTGAGCTA   |
| 36 | AGATGAATAACATAGCGAAGGTCTGAGCTTAATTGA   |
| 37 | CCTGGAGTGAAGCGCCATGACGACGACCCCGTTGA    |
| 38 | GAATCGCCATTCTTACCAAACAGGGAACGTCAAAAA   |
| 39 | TAATCAGAATATTTTGTTCGCCAATATTAGCGAAC    |
| 40 | CATATGTACAGTATCGGGGGCGCATCGTGTGTT      |
| 41 | GTAAAGTAAGCATTTTTCGACAAGAATAACAAGTC    |
| 42 | ATTCAACCGAGGCTATCATTTTTAGAACTTTTCCTT   |
| 43 | AATCACCATGAAGGGCGAAACCAGGCAACTCTATGA   |
| 44 | TCTTACCAACGCTAACGAGCGTCTTTCATTAGAGAG   |
| 45 | AGAGGGTAAGAATAAGTTAAAGGGCGAATCAAAATC   |
| 46 | ATCATTCCAGCAAATGGTCTGGAAGTTGGCGGATAA   |
| 47 | ATTAAACCATATTTTCATGGAGCAAACATGTCAAT    |
| 48 | ACCGGAACCCATAGCCCCAACGCC TGGAACCCATG   |
| 49 | GTGCCGTCGAAGCAAAGCGAAGTTTTGTGTCGTCATAA |
| 50 | TCAGTACCATCATTTCCATTCAACATGTTGCGGGAGG  |
| 51 | CCCTCAGAGCGTACCAGTACAACTACTTATTAGC     |
| 52 | CATGAAAGTCGAGAGGCTTTTGCAAAGGATTGCAT    |

|     |                                                |
|-----|------------------------------------------------|
| 53  | CCACCAGAACCACCCTCATTCTGTATGACGATCTAA           |
| 54  | AACGGGGTCGAACCTATTGGTAGAAAGCCAAAAGGA           |
| 55  | GTA CTGGTATTGGGGCGCATACATTT CAGAACGGGT         |
| 56  | TACCGTAACATACGTAATACTCATCTTTGACCCC             |
| 57  | ATATTCATTGGTCAATCAAGATTTGTATCATCGCCT           |
| 58  | TATACCAGTACGAACTAATGAATTTACTACAGGAGT           |
| 59  | CCAGAACGAGTAGTAAATTGGGCTTGACTGGCTCAT           |
| 60  | CAGCGATTATACCAAGCGCCACCCTCAGCGTCCAAT           |
| 61  | GATAAATTGTGTCGAAATACCATAAATTTAAACAGT           |
| 62  | AAATCATTTC AACTTTAATCATT TTTTTCACGTTGAA        |
| 63  | TACCGACAGGGCACGAATGTCAATAGAACAACAATTCGA        |
| 64  | CCTTGCTTCCCTTATGACACCTGAGCAAGTCACGACGTTG       |
| 65  | CTTTCATCAACATATAAGGCGTTTAAATTGTATGTAAATG       |
| 66  | AGAAAATACCCATCCTAAAGAAAAGTAAAGCAATAAAGCC       |
| 67  | CCAACAGGTCAGGCAGCACCGTTCACCGTACTTCATTAAA       |
| 68  | AGAGGAAGGAATTGTTTGAATGGACCACACCCGTATAACGT      |
| 69  | AGCTACGTGGTAACCGTGAACCCGTCGCTTCTGTAGCCAG       |
| 70  | TAAAACGACGGCCATAAGTTGGGAACTGTTGGCAATATGAT      |
| 71  | TAAATGCAATGCCTTCAACGCAAGGATAAAAAGGTCATTGC      |
| 72  | CTCCCGACTTTTAAATATTTGCTCCTTACCGGAAGCAA CT      |
| 73  | TCAGAGCATAAAGCCAGGCAAGGTATTTTCATATAAGTTTT      |
| 74  | GTAAGAGCAACACTCCAAAATAGATTAAGAGGGGGTTTTGC      |
| 75  | AACAAACATCAAGGAATTAATTCATTTCAATTAATGTCCCGAAAC  |
| 76  | GAGAATAAAGTACATATATGTGTCCTTGAAATACAGTAACCCAA   |
| 77  | CGGACTTTTCATACATTCAACCTCACCGTCACAGCCTTTATCCG   |
| 78  | TATACCACCACCCAGTATGTTGACACCACGTTGAGCGCTATGT    |
| 79  | TTAACCGTTTCAA ACTATAAACGCTCATGGAATACCTACATTTT  |
| 80  | AAACCTGTGACGGGCAAAGGCCACCGGAAACAAAGCGAACGTTA   |
| 81  | AACCACCAGCAGAAGATAAGTACCTTTTACATCGGGCGTGGCACA  |
| 82  | CAACAGTGCCACGCTGAGCGCACGACTTAAGTGTCCA ACTAATAG |
| 83  | TTGGATTATAAACAGAAAATGAATTTATCAAAATCATTAGCTTAGA |
| 84  | ATTTTCAGGAACGGATTCTTTTAAATGGAACAGTATTAATTACA   |
| 85  | TAATCTATTAATTGTCAATGTAATCGAGGCTGCGCTAACGCCAG   |
| 86  | GGTGCCGGATCGGTGCGGGCCTCTTCGAGTGGTTGTAGAAGCCAG  |
| 87  | CTGATGCAATTTTAACTCCGGCTTAGATCATTTCTCCCGCTTC    |
| 88  | GGGTAGATCTCAGGAAGATCGACTCTCGTGGTGTGCGGCCCT     |
| 89  | GCGAGTAACCATCTGCCATATAACTATAAACGTTAAAAGCCCCAA  |
| 90  | AAACAGGAATTTT GAGAATTAATTTTCCCTTAGAAAAGTGAATAA |
| 91  | AGAACCGCCCTGTTTATCAATATCAGAGAGATAACCAGCCAGTAA  |
| 92  | TTTGTTAAGCGCATTAGTTACCAGCGCCAAAGACATATTTTGTC   |
| 93  | AACACCTGTGAGTTAAGCTGGCATGATTAAGACTCAGGAAACGC   |
| 94  | AGAAAAGAAGCTTAGGGTAGCTAGATTGTATAACAGTAGGGAGAC  |
| 95  | AATCGGCTGAATAATATCATAATAAAGTTTAGCTACAAAGAATT   |
| 96  | GACCATTAGGAGCTGAAAAGGTGGCATGCGGGAGAAAACATTATG  |
| 97  | GGTGAATTAGATTGAGGGAGGGAAGGTT CAGATATACCAATCAAT |
| 98  | TGCTGTAGCATAACAGTTGATTCCCAAAGCCGTTTAGTACCGCA   |
| 99  | TACCTTTAAGCAACTAAACGGAAATTATCAGGAGGTAGAGGGTTG  |
| 100 | ATATAAGTATGCCCCCTGATATAAAAAGAAACGCAAAGCAAACGT  |
| 101 | TTGAGTGCCTTGAGTAACAGTAAACAAATAAGCAGATAGCCGAA   |
| 102 | GGTCAGACGATTGGCCTTGACGTTAGTAAATGAATTTGAACGCCCA |
| 103 | AATGGAAGCGCAGTCTCCGGAACAACATTATTACAATTTGAAA    |
| 104 | GTTTCAGCGGAGTGAGAATAGAAAAGGAAAGGCTCCATTAAACAGC |
| 105 | TACAATTTAGCTGATAAATTAATAAGTCTGAAAGAAGATGATGA   |

|     |                                                              |
|-----|--------------------------------------------------------------|
| 106 | TTAATTTTAATCTAAAATGGTTGCTTTGACGAGCACGCCGCTTAATG              |
| 107 | AAGTTTTCATTAACGGCTACAGAGGCTTTGAGTAATAGTATAATGCAGA            |
| 108 | CATTGCAACAGGAACGGCCTTGCTGGTAATATCCAGAACAACAGTCGGG            |
| 109 | AGTGTAGCGGTCACGCTGGAAGCGAAAGGAGCGGGCATTAAAAATACCGAACG        |
| 110 | ATTAAAGGGATTTAGACGTTAGAATCAGAGCGGGACCTGAAAGCCGAACTGAT        |
| 111 | TTGCCTGAGTAGAAGAACGTAGCAATACTTCTTTGAAAATGGATTGCCAACAGA       |
| 112 | TGCCATAATGGAAGCATAAATGGGGCCAGGGTGGTCTGAGAGAGTTGCAGCAA        |
| 113 | TTAGACTTTTAATACATTTGCCCCAGCAGGCGAAAAAGCCCGAGATAGGGTTGA       |
| 114 | GACAATATTCTACCATATCAAAATTATGGCAGATTACCAGTCACTCATATTCC        |
| 115 | ATTAGAGCCATAGGGGCTTGAATCGGTACACAATCCACACAACAGGTCATAGC        |
| 116 | TGATTATCAGATGATGGCAATTCATCATAATTTTCATCTTCTGACCGAACGCGAG      |
| 117 | TAATGGAAGCAAGACAAATAAATTTAAGGAATCATAATTAAGTAAAAAGCCTG        |
| 118 | TACCAAGTTACAAAATCGCGCAGAGGCAAAAACAAAACATAAATCAGACAAAAG       |
| 119 | TACCTATCCAATCGGGTTAGAACGACCTCTCGGAATTATCAGTAACATTACAGC       |
| 120 | TAAGAGAATCAGAGAGAATAACATAAAGTATAAAGCCAACGCTCATTACAAAAT       |
| 121 | CTGAGAGTCTCGTAGGAATCATTACCGAAAATTCGCATTAATTTTATCCTGAA        |
| 122 | AAACAGCCATATTATTTATCCCAATCCTAGCACCATTACCATTAGGCCATTTGG       |
| 123 | TGAAAATAGCCGACTTGACAAGGCCGCAAGTTTGCCTTTAGCGTCAGACTGTA        |
| 124 | AGAAAACATGAAATAGCAATAGCTATCAGGAAACCGTTATTACGTAGAGCCG         |
| 125 | CAAAGTTACCAGATTACCGAAGCCCTTTTTATTTACGAGCAACAATAGATGCCG       |
| 126 | TCAGAGCCACCACCTCAGCAAAAGAATACTAAAGCCACTACGAAGGCACCA          |
| 127 | GCCCAATAGTAGCATTCCAGCAGCGAAAGACAGCAGAGTTAAAGGCCGCTTTT        |
| 128 | GGATAGAACCGCCAATAGGTGTAATCAGTAGCGACAGAATAAACGTCACCAAT        |
| 129 | GTTAGCGTAGGATTTTGCCTTTTCGAGGTGAATTTCAAAGGAGCCTTTAATTGT       |
| 130 | ATTACGAGGAAGAACCAGCAACTTTGAAAGAGGACAGGCGCAGACGAATCCCC        |
| 131 | AATCTCAAAAAAACAACATAAAGGAATTGCGAGGAATACCGATTTACGCCCG         |
| 132 | CTGACCTTCATCAAGAGTATTCAGTGAATAAGGCTTGTAAATAAACAGGACGTT       |
| 133 | GTTACTTAGCCGGAACGAGATGAACGGGTACAGACCGATAAAAAATCATAACC        |
| 134 | GTATTATTTGCCAGAGCAAAATTAATAAAGAATAAACACCTGGTTTGAATACC        |
| 135 | TTTATAATCAGTGCAGCTGATTCCGAAATCGGCGTACTATATCTTTAGGTGGCAAATC   |
| 136 | ATGAGTAAATTCACATAAGTTGGTTAGTTTGAGGGTCGCCATTCTCGCTATTAGATC    |
| 137 | TCAAATGCTCAAAAATCATAAAGAGGAAAGCTTCAAAGCGAACAGTTGATAAGAGGTC   |
| 138 | AGTTTTGTGCTTGCAGGTGGAACGAGGGTAGCAAACGGGTAAAACCTGAGTTTGACT    |
| 139 | CTTATGCGATTTTAAAGAAGATGGTTTAAACGTAACAAAGCTGCATCAATCTTGACCATA |
| 140 | ACCGATATATTGATAGTTGCGCCGACAATGTTGAGATTTAATAATAATGTGAATTAC    |
| 141 | CGCCGCTACAGGGCGCAAAATCCCGTCAAAGGGCGAAAAACAGTATTAACACCGCCTG   |
| 142 | GCCCGCTTTTATTACCGCTCATTTTGCAGTAAAAGAGTCTGTCCATCTGAGAAGTGTT   |
| 143 | CAACTCGCCTGGCCTTTTCTTTTACCAGTGAGTGCCAGCTAATTGCGTTGCGCTCACT   |
| 144 | AATAACCGAACTCTAGGAAGGTTAAAGTTTGAACGACCAGTACGCCAGAATCACGCAAA  |
| 145 | TGCTGCAAGGCGATGTGCCAAGCTTTCTCAGGGAATTCATGAGCCAGCAGCTCAAATAT  |
| 146 | CGAGGCGTTGCAAGCAAAAAATATTGAGTACGGTGTCAATAACCTGGTGGCAACCCTAT  |
| 147 | TTTTGAAGCCTACAATTTTTGTTAAATAAATAATTCGCGTCTGGCGATTCTCCGTGGGA  |
| 148 | TCCAATAAATCATATAAATCGGTTGTACCAAAGCCTTTATTGAGTAATGTAGACAGTCA  |
| 149 | TATAGTCAGTTAGTACCGCGAAACAAAGTACAACGGTAAGGGAACTTTTTTCATGAGG   |
| 150 | ACTGCGGAACAGAGGGGGACTAAAGCGAACTGACATATTCATTATCGCCACGCATA     |
| 151 | TTGATACCGGTCGCTGAGGCTTTTCCAACATTCACAATGTTTAAACAGTTAATAGCC    |



**Table S5.** Sequence of 56HB hybrid staple strands

|    |                                       |
|----|---------------------------------------|
| 1  | GTGCCTTGATGCCGTCGAATTTTAGTT           |
| 2  | CGCAGTATGTAAGCAGATCCAAAAGAA           |
| 3  | AGCCCTTTTAAATAAGAGTTAATTGAG           |
| 4  | AACAAATAACACCAGAACAATAATATCC          |
| 5  | AACCCACAACCTGAACAAGTACCGCAC           |
| 6  | CCTCAGAGCTTTTCATAATACAATTTT           |
| 7  | TTAAACC AAAAGTCAGAGGAGGGAAGCG         |
| 8  | GCACCCAGCTCAAATCATTTTCGGTC            |
| 9  | CAGTAGGGCCAAGAAACACAGAGAGAT           |
| 10 | ACAAGAAAACACCACCAGAACC GCCAC          |
| 11 | CTATTTTCGGAAGTTACCATCTTACCGA          |
| 12 | AATAAACACGCAGTCTCTATATTCACA           |
| 13 | ACCCCTCAGATAGTACCGCCCTGCCATC          |
| 14 | CTCAGAGCCTTACGCTCGACCTTATGA           |
| 15 | TTTAACCTCTAATGCCACAAGACTTT            |
| 16 | TTTTACGTAATAAGGACTTAGTGCT             |
| 17 | CCAAAAAATTCTTCTAAACGACGGCC            |
| 18 | AACGCCTGTGCAACGGCTGGATCGTCA           |
| 19 | AGGTACAGTAACGGCGGACAGTCACGA           |
| 20 | AGTGCCAAGGAAAGGGGGCTTTCGG             |
| 21 | CCCTCAGCAGCTGAGGCTCATTA AATT          |
| 22 | CAATGTCCCGGGTGGATGAGGCTCCAA           |
| 23 | TTCATGAGGACGAGGGTAAGCATTCCA           |
| 24 | GGGCACGAACTAATCTATACCACCCTC           |
| 25 | AGGCAAAAGTAAAATACGCGGCTTAGG           |
| 26 | AAAAGGGTGCCAGCGATAAATGCAAT            |
| 27 | ACGAGCCGGTTTAGCTATGTGAAATTG           |
| 28 | CTGGGGTGCAAGGAGCGGACACAACAT           |
| 29 | CCGTCAATATTATCTAAAAATCTTTA            |
| 30 | TTTTAAATAGCAGGCGAAGCTTAATTG           |
| 31 | TTTGCCCATGCAACTAAGGCCCTGAG            |
| 32 | CTGAATATATATCATAACAGAGGTCAT           |
| 33 | TGATGGTGGCAAACCCCTCCACGCTGG           |
| 34 | AAAATCTAATGGCAAATCAACAGTTGA           |
| 35 | GAGATAGAACTATTAGTCTTTAATGCG           |
| 36 | ACTTGATAGCAAGGGTCTGAGAGACTACCTT       |
| 37 | CAGTCAAATCACCTGACCTCCTTAAAGATTC       |
| 38 | TATAAAGCCGACAAAAGGTATACAAATCAATA      |
| 39 | ATTCGTGCAGGGAGACAACCATCGCCACGCA       |
| 40 | CTGGCATGACCTCAAGAGAAGGATTAGGATTAGCGG  |
| 41 | GCAATAATAACGGAATACAGCCGAAACCACTATTA   |
| 42 | TACTGGTAATAAGTTTTAATGAAAAGCCGGAATCAT  |
| 43 | ATAGCCCCAGCACCGTAACCATTAGCAAGGCCGGA   |
| 44 | AGCACCATTAATCAGTAGCGACAGAATCAAGTTTGCC |
| 45 | ATTCAACCGATCGGTGCGAAGATCGCATGGGCGCAT  |
| 46 | GTGAATTATTAACGTTAATTTTTGTTTCGCCATT    |
| 47 | CAAGCAAATCAACCCGTCGGATTCTCCAAGGGCGAC  |
| 48 | TAGCGAACCCGCTCTGGCCTTCTGTTCATTA AAG   |
| 49 | AATCGCCATCATTACCGCAAAGGAACATGAAAATCT  |
| 50 | CATCCTAATTAAGAACGCTCTGTATGGACAACTAC   |
| 51 | AAGAGAATATCAGCGGAGTGAGAATAGGCCCAATAG  |
| 52 | ATAAACACACGTTAGTAAATGAATTTGAGGCGTTT   |

|     |                                                |
|-----|------------------------------------------------|
| 53  | TTCTGAAACCATTTTCGACAGGAGGTTACCGCCACC           |
| 54  | AATAAGGCGGGTTTGAAATTTGATGATACAGGAGTG           |
| 55  | GGTTTTGCTTAGGTGTATCACCGTACTGCCAGTAAT           |
| 56  | ATTTTCAGGTCAACAGTTTAAAGTACCAACGCTCAA           |
| 57  | TTGGGTTATTCTTTCCAGATGTTCCAGCAAGTCCTGA          |
| 58  | AAGGAGCCTAGCGAGTAACAGATATAGGAACGGGTA           |
| 59  | CAGACAGCCAAAATAATTTCCCGACTTTGCTATTTT           |
| 60  | CACCGCTTCGGAAGGGCGATTGAGGGAAACAGCCAT           |
| 61  | TTTGTTAAATTTAAATTGCACCGTCACATCACCAGT           |
| 62  | TAACCGATAAGCCCCAAAAGCAAATATCAGCTCAT            |
| 63  | GGCTCTGAGTTTCGGATCCCGCTCAGAGCAAGAAG            |
| 64  | ATAGCTTAGAGCCCGGAACAGTACCAGGCCCTGC             |
| 65  | ATATTCAACCGTTCTAGCAGAAAGGCCAAACGAAAG           |
| 66  | AATGCCGGAGCAAGACAAAATTTAATTTAAATAAG            |
| 67  | TTAACAATTTTAGAAGGTGAGACGGAGATTAGAG             |
| 68  | GCCTGAGTAGCAAGGATAAAAATTTTCTGTAATAC            |
| 69  | CCTGAGCAAGAAACAATAACGGATTCGGATGAATAT           |
| 70  | CCTTGGTGCTTGTATTCTGCGATTATGCGATGTAGA           |
| 71  | TTTTGCGGGTAAAGCTAAATCGGTTGTAGAATTAGC           |
| 72  | ACAGTAACATAACCATATCAAATTTTGGATTATA             |
| 73  | CTTCTGAATCACAATTCCAATTATCATCATATTCCT           |
| 74  | CCTGTCGTGCACATTAATTGCGTTGCGGTGTAAGC            |
| 75  | TGGCTATTTTTCAACTTTAATCATTGTTCCAGTGAA           |
| 76  | TGGTTTTTCGGCCAACGCGGGGAGGTCCGGAAA              |
| 77  | GGAATACCAGGAACAACATTATTACAGTTTAAAGAAC          |
| 78  | GCATAGTAAGAGCAACACATGCTGTAGTGAGATTTA           |
| 79  | TTTTGCGGAAGGATTAGAGAGTACCTTAAAGCGAAC           |
| 80  | TTGCTGAACTGAGGCGGTCAGTATTAATACCGAACG           |
| 81  | CAGACCGGAGAAAGACTTCAAATATCGAAAGCGGAT           |
| 82  | AACCACCAGGACAATTTTTGAATGGCCCTTCTGA             |
| 83  | TGCATCAAAAATCAGGTCTTTACCTGAAACAGTTC            |
| 84  | AGAAAACGAGAATGACCAAAAAGAACGTGGACTCAA           |
| 85  | ATCCTGAATGGAAATTATAGCCAGCTTAAAGCGCCATAAA       |
| 86  | GCCTACAGTTAATGCGGATAAGGTAACAGTGCAGGAAAC        |
| 87  | TAGGGGTTGGTGTCTGGAAGTTTCATCAGTCTCAACATG        |
| 88  | AAACCAGGCTCATCAACATTCGAGGTGGCTTTTGCACAGA       |
| 89  | CGGTCGCGAAAGACGTCAATCATACGCCATCACTCATAGTT      |
| 90  | CGTCAAAGGGTAAGAATAGAACAAGAGAATAACCTGAAGCA      |
| 91  | CAACTAATGCAGATTGTATCATCATATATTTTTATACCAAGC     |
| 92  | GCGAAACAACAAGGCTAAACACTCATCTTTGACCTGATAAATT    |
| 93  | CATTAGACGAAATAGCAGCCCAATCAAATAAGAAACGATTTTTT   |
| 94  | ATCGATAGCTTATTAGCGCGTCTTTCCAATATTGACCTTACCAAC  |
| 95  | ATTATTTATCCTTTACAGAGAGAATAATTTGCCAGTAATGAAACC  |
| 96  | AATTTTCATCTTCTGACCTAGAACGCGAGAAAACCTTACGACGACA |
| 97  | TGTAAGCAAGTGAATAACCTTGCTTCTTTTTAATGGAACAGTAC   |
| 98  | AATTAATTTTCCCTTAGAATCCTTGAATATATGTGACTCGTCCGGT |
| 99  | ATAAATCAATTTTACATAACATCAAGAAAACAAAATTTTCAATTA  |
| 100 | TCCGAACCTCTGAGAAGACTTGAATCGGCTGACGCAAAACATAGCG |
| 101 | AAAATTAAGAGCATTAAACATCCAATAAATGAACGGTGGTGGCATC |
| 102 | AGAGTTGCAACAACATAATGCAACAGCTGATTGCCCTGCGCCAGGG |
| 103 | GGAGCACTAGCAAGCGGTAATCAATATCTGGTCAGTAGCATCACC  |
| 104 | GCGAGAGGCCTTTTGATACCTCGTTTACCAGACGACAATTACGAG  |
| 105 | CCTGAAAGCGGAAAAACCGTCTATCAACCAGTCACACGACCAGT   |

|     |                                                              |
|-----|--------------------------------------------------------------|
| 106 | TCCCATACCTCGATACATCGGAAAGAAGATGACAGGGCTTCCCAA                |
| 107 | GACGGATCGGTTTATGAGAAGCCAGCCAAAATAAACCATGTAAACA               |
| 108 | GCTAGAAGGAAACCCCGTATAAGTTTAGTATAAAGCCAGAACGGGGTCA            |
| 109 | CAGGCTGCGGTTGCGCCGACAATGACATTAAGGCCAATTTCTTAGTCA             |
| 110 | CAGGGGCTCTTCGCTATTACGATACCGATAACAATGTTGTGGTGCCGG             |
| 111 | AATTCTACTGTTTCTGTATTTTCATTTGGGGCGCGACGTAACAACAAA             |
| 112 | TGCATAAATCCTTAAACATCGCCATTA AAAACACCGCCTGCAACAGTGC           |
| 113 | TTGGTCACCGCTAGTACGGTGAATGAGTAAATGAAACAAAATCATTTC             |
| 114 | AAGATTCATTCCACGGCAAATCAACAGGTCGGCTTAGAAAATCCTGTT             |
| 115 | TCATTCAAAAGGCTTATATCGGCTGTCGCTAATATATGAAATAGTCTTA            |
| 116 | AGCATAGCATCGGAAAGTTTCCAGAGAATCGAGTTTTGTGCGATAACTATA          |
| 117 | AACAATTAACGGGAATACACTAATCAGGTCAAATCCAATCGAGGGTAGC            |
| 118 | CTGATTGTTTGCACGTAAAACAGAAATATTTTAAAAGAGCTAACTCCAGC           |
| 119 | TTATCCGCTAATGGAAGGGTAATCATGAACAGCTTGCAGCTGGCCTTTC            |
| 120 | TTACCACGAGTAGAGATAGGGTTAGGAAGCCAGCAAATCCCTTATAA              |
| 121 | ATCAAAAGAAAACAGAGGCTCAAATATTTCCGAAATTATAACAGTGCCTA           |
| 122 | TAAACTCACTGCCACCATTAGACTCGAATTCGTTAGAACCGTACCTTTTAAA         |
| 123 | TCAGCAGCTTGCTTTAAATGTGTTAATTGTAGTCACCAGTGATTTTGCTACCG        |
| 124 | ACGAGAAAACACCAGCAGACGGTGCAAGGCAAACCAAAAACCCATGTTACAACT       |
| 125 | CACACAGAAGATAATAGCCGATTTAGTTTGCCTTTCCAAGGCGGTTTTGAT          |
| 126 | TAAAGGTGGTAAGCCCAATAAGAAAAGTTAGCAAACAGGCAGAGGATGAAAGTA       |
| 127 | CCAGTGTAGAAACAGAGCCGCATCCTCATTATCATATGCGTTAAAGTAATAAAAA      |
| 128 | ACCACGGAACCTGAACACGAATTGAGTCAACATATACGTAGGAATTTTAAACA        |
| 129 | GTTTAAACGTCAAAAATGAGGAGAATTATAAGTTTATTACCAGCGCACAAAGCAAG     |
| 130 | GCCAGCAAACGACTTGAGAGCGCTTTTCATCGGCACCGGAACCAGAGCCACCA        |
| 131 | AAGATTAGTGCAGGAGGTCAGAGCCGCCACCCTCAGAGCCGCCGCCAGCATTGA       |
| 132 | ACAATAGATTAATGCAGAGTCAGACGATTGGCCTTGGAAATTTACCGTTCAGTA       |
| 133 | CGTAACCGTGGGACGACGACAGTATCAAGGCGATTAAGTTGGGTAATATAATC        |
| 134 | CGTTGTAAGTGGTTGTGAATTCATGCTTTTCAGGTTTAAACGTCACCTGATTGC       |
| 135 | GAATTGTCACCCTGGAGTGACTCTATGGCAGAGGCGAATTATTCATAATTACAT       |
| 136 | TTTGAATACAACCTCGATTTAATGAATTTTTCACCATATTAGACTAGCAAATGA       |
| 137 | TAGCTAATAGTAGTCAATAAAGCGGTACCGAGTACATTTTCGAGCTGCTCATGAA      |
| 138 | GATTATCAGGAACAAAGAAACCACCAGCTAATGAGTGTGTTGAGTATGGCCAACA      |
| 139 | TAAGGCTTGATTCATTACCCAAATCAAGCTGAAAAGTACAGACCAGGCGCATA        |
| 140 | CAGTCAGGACGTTGCGACCTGCTATTATGACCAGAACCCTCGCCTGATAAAGCA       |
| 141 | TAACATTGAGGACTTACGAAGGCAAATCATAAAGCTACGTTATTTCAACATGTG       |
| 142 | TGGTCTCCACTATTTAAATCAAAAAGATTAAGGAGTGTGTTCCAGTTTGCGTGG       |
| 143 | CTTAGCTAACGAGTTTGCCATCCACCACCCTCAATCAATACCGGATTTCTTACGAGCA   |
| 144 | TAGGACCCCGCTTTATAGGGGCGTCAATAGTTATAAGTATATTAAGACGATCAATATG   |
| 145 | GGCTGGCTGAACTTTGAAGAGGACAGATCATACAGCAATCATAAAATCAGAAATATT    |
| 146 | GGGGTAATATCGAGCTTCTAATTGCTCTTTTGC AAATTAATAAAAACGAACTAACCATT |
| 147 | CCAATACTGGTCAGAAGCCGTTTTAATGTAAAATGTGGGCTTGAGATGGTTTAAATAC   |
| 148 | AACGTCACCTACAAAATAGGGAAGGTAAGAGCCTAACATAAAAACGTAATTGAGCTTTC  |
| 149 | TCATCGAGACAAAGACAAGTGGGAACATGGGTGAGACTCCAGCCAATGTGCTGCGGCCT  |
| 150 | AATTACTAGTCTGTCCAGTTCAAATATGAGGGTTGAGAATTTATACCAACCTAGGAGA   |
| 151 | ATCCCCCTCAAATGCTTTACTATTATACGGAATCGTATCTTGACAAGAACCGGACCCTG  |

**Table S6.** Sequence of 52HB hybrid staple strands

|    |                                        |
|----|----------------------------------------|
| 1  | ATAATAACGGGACAGATGGACGGTCAA            |
| 2  | GAAGGCACCCGACGATAAAGGCATAGT            |
| 3  | CACCAATGAACCGACTTGAAATTCATA            |
| 4  | GTTGAGGCACCACCAGAAAAGGAGCCT            |
| 5  | GAGGGGACGTTTCAGGGATGATGGGCGC           |
| 6  | CGAAAGAGACTTTAATGCCGACAAGGCG           |
| 7  | ATCGTAACTTGTTAAACGTAATGGGCCGGA         |
| 8  | ACATAGGCTCCAACCACCACCAACCGCCACC        |
| 9  | ATAGAAGCCATTTGTAAGTTTATTCATTAAG        |
| 10 | TGGTTTACATATTGACATTGGGCTCGAAACAA       |
| 11 | TTAATTGTTTTACGTCGATTTTGAAGAAAA         |
| 12 | TATTAGCGACGCATAAAGCATCGGGAAACGCA       |
| 13 | CAGTAAGCTTAAACAGTTTTTCATGGCCACTAC      |
| 14 | AGGCGTTGCTTGTACCTCCGGAATCGTCATA        |
| 15 | GAAGCCTTTATTTCAACGGCCAGCTTTTTGACC      |
| 16 | CCAAATAAGAAACGGAAGCCGAAAGTGCGGCC       |
| 17 | TACAGAGAGAATAACCTGACTATTATTGAATC       |
| 18 | AAATCAGGTCTTTACATAAAAAACAGGTGCGTTA     |
| 19 | GAGGTTTTGAAGCGCTTAGAGCTTAAAAAGTGT      |
| 20 | AGAACGCTGCAACTAAAGTAACGACGGCCAGTG      |
| 21 | CCGCACTAAGCCGTTTTTATCCAGAGCCTAATT      |
| 22 | AATAATCAATCAGATATAGAGCACCAGCTACA       |
| 23 | ATTTACGAAGCGAACCAGACCGTTTTAATTCGA      |
| 24 | AGCAACTGGGGAGAGGCGGTCCCTTAGAATCCT      |
| 25 | AGAGGCATAAACAGCCATATAAGAGCAAGAAAC      |
| 26 | CTAAATTTAAGCCCAATAATTTATCCCAAT         |
| 27 | AGAATAATCAGAGGGTAATTAATAGCAGCCTT       |
| 28 | AAGACAAAGAACGGTAAATCGTCGCTGCCAACA      |
| 29 | GCTTAGGTTGGGTATAGCTTAGATTAAGCCA        |
| 30 | TGAAAACATAGCGTATATAACTATATATAAATA      |
| 31 | TTTAATGGAAACATACAGTAACAGTAACGGGTA      |
| 32 | GGATTCGCCTGATAAATTAATTACATGACAATA      |
| 33 | AAAGGTGGCGCAAAGACACCACGGAAGGAATTAG     |
| 34 | AGCCAGCAAAACGTTAATATTTGTTTCGCCATCA     |
| 35 | AAGAGCAACTTCATCAGTAATAAACGAACTAACG     |
| 36 | ATCTACGTTTGAGATTTAGGAATACCACATTCAAC    |
| 37 | GAGTAGTAAGGAAATTTTGTCCAAACATACAT       |
| 38 | CCAAAAAATCAACCGATTGAGGGAGGAGCCGCCA     |
| 39 | GTGAATTACCTCCCTCAGGAAGGTAACAGCGCCAA    |
| 40 | GTTTGCTTGTAGCCAGCTTTCATCAACATTAAT      |
| 41 | CATTAAGCCTCCGTGGGAGTTTTGTCGTCTTTCC     |
| 42 | AAGCGCAGTCTCTGAATACAAACAAATGACAGGAG    |
| 43 | ACCTCAGATTTTCGAAATGGTCAATAACCTGTTT     |
| 44 | AAAGAACTACGAGAAAGAGGCTTGTAGAAAATATCA   |
| 45 | GATAGTTGCCATTGTGAATTACCTATTGAAAATCT    |
| 46 | GTGAGCGAGTTTTTTAACC AATAGGAAAAATTCGC   |
| 47 | AGACGTTAGCCCTCATAGTTAGCGTAAACAACTAC    |
| 48 | AGCTATATTTATGACCCTGTAATAC TTGAGCATAAA  |
| 49 | AATATTCATTGAATTTAGATTTACCAGAAACCTAAAA  |
| 50 | GAAGTTTCATTCCATATACAACCGCCACCGATCTACA  |
| 51 | GTGTTACCAGAAGTACACTAAAAACCTCGCTGGATAG  |
| 52 | CTAAAAACAAACGGGCCACCCTCGGGTTTTGTACCGCC |

|     |                                                  |
|-----|--------------------------------------------------|
| 53  | AAAGTGTAAGCCTGGGGTTTAAGCTACGTGGTAAATA            |
| 54  | AAGGGCGAAAAACCGTCTATAGCTGGCGAAAGCAAGTA           |
| 55  | TAGAAAGAACTATCATACTCATCTTAATTTAGCAAA             |
| 56  | CCAAGCTTTCTCACAAAAGAAATAGCCGCGCAGAGGCGAA         |
| 57  | TCCAAGACCTTTTACATCGGAACGTGGACTCCAACGTCA          |
| 58  | AATTTACAAGTTACAAAATCCGAGATAGGGTTGAGTGTT          |
| 59  | GAGTAAACAGGGCGCCTAATGAGTGATTTTTAACCTCCG          |
| 60  | GTTCCAGTTTGAACAAGAGGGTTTTCCAGTCCAATC             |
| 61  | ATTAGATAACAGTTGATTCCCAATAGCAAGCAGGCTGTC          |
| 62  | AGATCGCTGAGTAATGTGTAGGTAAGATTCAAAGGGT            |
| 63  | CCGTGTGGTAAATGCTGATGAACATACGAGCCGGAAGCAT         |
| 64  | GAGGATCCCCGGGTACCACAATTCCACACCAATCCAATCGC        |
| 65  | TAGCAAACGCAGGGAGTTATTACATTAGCAAGGCAGAATCAA       |
| 66  | AGACAAAAGTGACAACAACCGGAACCAGCCAGCATTAAATCCT      |
| 67  | AAATCATAACAGGCAAGGGTTGTACCAATAGTAGTTATTAAGAG     |
| 68  | AAGTTGGGTAACGCCAGTCCACTATTAAGGAGAAAACAATAAC      |
| 69  | TCATAAGGGCCTGCTCCAGAGATTTGTATCATCGCCTGATAAAT     |
| 70  | AGTACAACGTGTTACTTAGCCGGAACCAGCGATTATATTACAGG     |
| 71  | CTCAGAGCCACCACCTAAGGAACAATAAATTTATCGGTTTA        |
| 72  | CGCGTTTTTCATCGGCATTTTCGGTCAAGTAGCGACCGGAAACGT    |
| 73  | CGTCGGATTTTTTCATAAATAGCAGCACCGTAATCTAGCCCCCT     |
| 74  | TTTTCTGTATTTGCTAAAGATTGGCCTTGATATTCTTACCGTTC     |
| 75  | GGTAGCTATATCGGCCTCCAACCGTTCCAGAAAAGCGCCAGTTT     |
| 76  | GCTAAATCGCAAAGAATTAGCAAAATTAAGCAATAGAACCCTCA     |
| 77  | GCTCAAGAGCCGGAATAGGTGTATCACCGTACTCAGGAATTCTA     |
| 78  | GGCGCATAGGCTTTAAGAAAAGTAAACAAGAATTGAGTTAATGGT    |
| 79  | CCCTCAGCAGCGAAAGACCCGATATATTGGTTCGCTCACCAGAAC    |
| 80  | CAGGCGGATTCTCAAGAGAAGGATTACCCATGTACCCCCCTGCC     |
| 81  | AAAAAGATTAAGAGATTTTTTGTAAATTGAGAATCGTACCGA       |
| 82  | CAACAGGTCAGGATCTTACCAACGCTAGGTAAGTAATTTATCAT     |
| 83  | ATTTTTGCGGATGCTTAAATCAAGATGCAGAACGCGCCTCATCCT    |
| 84  | ATTTTATCCTGAATTAGAGAGTACCTCAACCTTATGACATCTGTA    |
| 85  | TTAAACGGGGATGTGCTGCGCGATCGGTGCGGGCCTCTTCGCTAT    |
| 86  | TTTCTCTGTCCAGACGACTTAACAATTTTCATGAGTTGCAGCAAG    |
| 87  | AACAACAGTGCTGAATTGTTAATTGCTCCTTAGCGGATTGCATC     |
| 88  | TGTGAACGCATTTACATATCCAGTCGGGAAAAGTCAATAGTGAA     |
| 89  | CTGCCAATGTCCCGCAAACCTGGCCCTGAGATTGAATTACCTTT     |
| 90  | TGTAATATGATACCGACAGACTTCAAATATCGCGGAAGCAAACCTC   |
| 91  | ACGCTCGAATATAGGGGCCCTAGTCAGAAGCAATTGATAAGAGGTC   |
| 92  | TACAAAATTACTAGAAAACCTGAGAGACTACCGCTAACTCACATT    |
| 93  | TTGAAACATATTTAACAACATTAATTAATTTTTTTCGCTATTGGGC   |
| 94  | TTTCTGTGTGAAATTGTTATCCGCTCGAGCTCGAATTCTCTGAC     |
| 95  | TAACCTTGCTTCTCGAGAAAACCTTTGTTAATTTTCATCTGTAATC   |
| 96  | CTGCATTAATGAATTTGCCCCAGCAGCTTAAGTGCTTATGTTTC     |
| 97  | GGGCAACAGCTGATTCTTTTACCAGCTGGAGTGACTCTTTAGGC     |
| 98  | CGGTCCACGCTGGTCGGCCAACGCGCCGTCGGTGGGCACAACAGT    |
| 99  | CGTCAGATGAATAGTACATAAATCAAATAAGAGAATATATAATCT    |
| 100 | CCCTCAGAGAGCCGCCGAGCCACCAATAGGTCCTCACCAGTCGAT    |
| 101 | TATTTTCGGAACCTATTAACAGTGCCCGTATAAAAGCATTCTTTTT   |
| 102 | CAGTTTTTTCGAGACTCAGAACCCGGATTGACTCAGCTCATAACAACC |
| 103 | GCCAGGGTGGTTTTTTCCTTACCAGATAACCCCGCTTCAAGTACC    |
| 104 | AAGGCTATCAGGATCATTACCGCGCAATTCGCGAACAAGGCGATT    |
| 105 | TATATTTTAAATGCAATGCACTCCACAAGGATAAACCTCATTACGA   |

|     |                                                             |
|-----|-------------------------------------------------------------|
| 106 | GACAAAAACGAGCGTCTTTTTTCATCGTAGGATCATTGGCCGGAGAG             |
| 107 | GAACAACATTACCAAGCGTGAGATGGTTTTGACCCCGAGGCGCAAACG            |
| 108 | AGCTAATTAGTTGCTATTTTAGGCTTATCCGGTGGTTTAGCTCAGTAC            |
| 109 | AATAGGAAGGATTAGCAGAGCCACCAAATTTTAAAGCCTCATTGCGGGA           |
| 110 | GCTGAGACAAGTGCCGTCGAGAGGGGGTAATAAGACAGACAGTAAATGAA          |
| 111 | AATTCTACTAAAAACATTTTCAATTTGGGGGCCCATGTTTTAAATAGAGGCG        |
| 112 | GGCTGATTCATGCGCACGAGCGAAAATCCTGTATGATGAAACAAACATCA          |
| 113 | TATTCATTATGACCAACCTTCATCAAGAGTAATCTTTTGCGGGATCGTCA          |
| 114 | TGTGTCGAAATCCGCGAAACCGAACCCCAAATCACTTGCCCTGGGCATGATT        |
| 115 | GGACGTTGGAAGAACTGGCGCCAAAAGGAATTACGAAACCAAATAGCGAGA         |
| 116 | CGTCCAATAAGCAACGGCTACAGAGGCTTTGAGGACTAAAGACTCTTGATACC       |
| 117 | ATTAATTTTCGTGCATCTCCAAAAACAGGAAGATTGTATAAGCGTACCCCGG        |
| 118 | AACGCCTGTCAGTTAATGCGTAACACTGAGTTTCGGTTGGTGTAAAGCAAGCCC      |
| 119 | GTTGGGAAGGGAGTAGATTTAGTCCGGCACCGCTTCTGGTTATGATATTAGGA       |
| 120 | AGGGCTTACGTCAAAAAATGAGAGCGCTAATATCGGTCGCAAAGTACAGACCA       |
| 121 | ATACGTAATAGGAAGGAATTAACCTGAACCTTTAAACAGTTCTGGTTGGTGTAAAT    |
| 122 | AGAAGAAACCGAGAACGAGAGAGAGATAACCCGCAGATAGCCGAAGATAAAGACG     |
| 123 | ACCGTCACCGTCAACCATCGTCAAAATCACCATCGCCCTTTGCCATCCAGAATGGA    |
| 124 | AAAATAATTAACGGTAATAAATTAATCCTGAGAGTCTGGAGCAAGGCTGCGCAACT    |
| 125 | AGAAAACATGCTTTGAATACCGAGCATGTAGAAAACGACGTTGTAAACGGTGTCTG    |
| 126 | AACGGGAGAAATAGACAGAGCCGGGTCAGACCAACTTTCAGTGAATTTTCGTCATACAT |
| 127 | ACGGGATTTGTTTTGCCAGAGGGGGTAATAGTAAAATGTCCCCCTCAAATGACCCTG   |
| 128 | ATGGTCACAATAGCTATCTTACCGAAGCCCTTTGGCTGATTTGAAAGAGAATACCCA   |
| 129 | TTGATAATTAGCTGATCGTAAAACCTAGTCAAATCACCATCAAGCCGAAACAGGCAAA  |
| 130 | AACAAAGACACCGGAATCATTTCTTACCAGTATAGACGCTGAGAAGCCTGTCGTGCCAG |
| 131 | TTTTAGCAAAAATAATATCCGTTTATCAACAATTGAGCAAAAGAAGTTGATGGTGGTTC |

### Sequence of P3024 scaffold

CCCGGTACCCAATTCGCCCTATAGTGAGTCGTATTACGCGCGCTCACTG  
GCCGTCGTTTTACAACGTCGTGACTGGGAAAACCCTGGCGTTACCCAA  
CTTAATCGCCTTGCAGCACATCCCCCTTTCGCCAGCTGGCGTAATAGCG  
AAGAGGCCCGCACCGATCGCCCTTCCCAACAGTTGCGCAGCCTGAATG  
GCGAATGGGACGCGCCCTGTAGCGGGCGCATTAAAGCGCGGGCGGGTGTGG  
TGGTTACGCGCAGCGTGACCGCTACACTTGCCAGCGCCCTAGCGCCCG  
CTCCTTTCGCTTCTTCCCTTCTTCTCGCCACGTTTCGCCGGCTTTCCC  
CGTCAAGCTCTAAATCGGGGGCTCCCTTTAGGGTTCCGATTTAGTGCTT  
TACGGCACCTCGACCCCAAAAACTTGATTAGGGTGATGGTTCACGTA  
GTGGGCCATCGCCCTGATAGACGGTTTTTTCGCCCTTTGACGTTGGAGTC  
CACGTTCTTTAATAGTGGACTCTTGTTCCAAACTGGAACAACACTCAAC  
CCTATCTCGGTCTATTCTTTTGATTTATAAGGGATTTTGCCGATTTTCGGC  
CTATTGGTTAAAAAATGAGCTGATTTAACAAAAATTTAACGCGAATTTT  
AACAAAATATTAACGCTTACAATTTAGGTGGCACTTTTCGGGGAAATG  
TGCGCGGAACCCCTATTTGTTTATTTTTCTAAATACATTCAAATATGTA  
TCCGCTCATGAGACAATAACCCTGATAAATGCTTCAATAATATTGAAA  
AAGGAAGAGTATGAGTATTAACATTTCCGTGTCGCCCTTATCCCTTT  
TTTGCGGCATTTTGCCTTCTGTTTTTGCTCACCCAGAAACGCTGGTGA  
AAGTAAAAGATGCTGAAGATCAGTTGGGTGCACGAGTGGGTACATCG  
AACTGGATCTCAACAGCGGTAAGATCCTTGAGAGTTTTTCGCCCCGAAG  
AACGTTTTCCAATGATGAGCACTTTTAAAGTTCTGCTATGTGGCGCGGT  
ATTATCCCGTATTGACGCCGGCAAGAGCAACTCGGTTCGCCGCATACA  
CTATTCTCAGAATGACTTGGTTGAGTACTACCAGTCACAGAAAAGCA  
TCTTACGGATGGCATGACAGTAAGAGAATTATGCAGTGCTGCCATAAC  
CATGAGTGATAACACTGCGGCCAACTTACTTCTGACAACGATCGGAGG  
ACCGAAGGAGCTAACCGCTTTTTTGCAACAACATGGGGGATCATGTAAC  
TCGCCTTGATCGTTGGGAACCGGAGCTGAATGAAGCCATACCAAACGA  
CGAGCGTGACACCACGATGCCTGTAGCAATGGCAACAACGTTGCGCAA  
ACTATTAACCTGGCGAACTACTTACTCTAGCTTCCCGGCAACAATTAATA  
GACTGGATGGAGGCGGATAAAGTTGCAGGACCACTTCTGCGCTCGGCC  
CTTCCGGCTGGCTGGTTTATTGCTGATAAATCTGGAGCCGGTGAGCGTG  
GGTCTCGCGGTATCATTGCAGCACTGGGGCCAGATGGTAAGCCCTCCC  
GTATCGTAGTTATCTACACGACGGGGAGTCAGGCAACTATGGATGAAC  
GAAATAGACAGATCGCTGAGATAGGTGCCTCACTGATTAAGCATTGGT  
AACTGTCAGACCAAGTTTACTCATATATACTTTAGATTGATTTAAACT  
TCATTTTAAATTTAAAAGGATCTAGGTGAAGATCCTTTTTTGATAATCTC  
ATGACCAAAAATCCCTTAACGTGAGTTTTTCGTTCCACTGAGCGTCAGACC  
CCGTAGAAAAGATCAAAGGATCTTCTTGAGATCCTTTTTTTCTGCGCGT  
AATCTGCTGCTTGCAAACAAAAAAACCACCGCTACCAGCGGTGGTTTG  
TTTGCCGGATCAAGAGCTACCAACTCTTTTTCCGAAGGTAACCTGGCTTC  
AGCAGAGCGCAGATACCAAATACTGTCCTTCTAGTGTAGCCGTAGTTA

GGCCACCACTTCAAGAACTCTGTAGCACCGCCTACATACCTCGCTCTGC  
TAATCCTGTTACCAGTGGCTGCTGCCAGTGGCGATAAGTCGTGTCTTAC  
CGGGTTGGACTCAAGACGATAGTTACCGGATAAGGCGCAGCGGTCCGGG  
CTGAACGGGGGGTTCGTGCACACAGCCCAGCTTGGAGCGAACGACCTA  
CACCGAACTGAGATACCTACAGCGTGAGCTATGAGAAAGCGCCACGCT  
TCCCGAAGGGAGAAAGGCGGACAGGTATCCGGTAAGCGGCAGGGTCG  
GAACAGGAGAGCGCACGAGGGAGCTTCCAGGGGGAAACGCCTGGTAT  
CTTTATAGTCCTGTTCGGGTTTCGCCACCTCTGACTTGAGCGTCGATTTTT  
GTGATGCTCGTCAGGGGGGCGGAGCCTATGGAAAAACGCCAGCAACG  
CGGCCTTTTTACGGTTCCTGGCCTTTTGCTGGCCTTTTGCTCACATGTT  
TTTCTGCGTTATCCCCTGATTCTGTGGATAACCGTATTACCGCCTTTGA  
GTGAGCTGATACCGCTCGCCGACGCCGAACGACCGAGCGCAGCGAGTC  
AGTGAGCGAGGAAGCGGAAGAGCGCCCAATACGCAAACCGCCTCTCC  
CCGCGCGTTGGCCGATTCATTAATGCAGCTGGCACGACAGGTTTCCCG  
ACTGGAAAGCGGGCAGTGAGCGCAACGCAATTAATGTGAGTTAGCTCA  
CTCATTAGGCACCCCAGGCTTTACACTTTATGCTTCCGGCTCGTATGTT  
GTGTGGAATTGTGAGCGGATAACAATTTACACAGGAAACAGCTATGA  
CCATGATTACGCCAAGCGCGCAATTAACCCTCACTAAAGGGAACAAAA  
GCTGGAGCTCCACCGCGGTGGCGGCCGCTCTAGAACTAGTGGATCCGT  
AAATCAATGACTTACGCGCACCGAAAGGTGCGTATTGTCTATAGCCCC  
CTCAGCCACGAATTCGTCTGACGACGACAAGACAAGCTTGCGTGTGAA  
TTCCCTGGCTTCTCCTGAGAAA



### Sequence of P7560 scaffold

AGCTTGGCACTGGCCGTCGTTTTACAACGTCGTGACTGGGAAAACCCT  
GGCGTTACCCAACCTAATCGCCTTGCAGCACATCCCCCTTTCGCCAGCT  
GGCGTAATAGCGAAGAGGCCCGCACCGATCGCCCTTCCCAACAGTTGC  
GCAGCCTGAATGGCGAATGGCGCTTTGCCTGGTTTTCCGGCACCAGAAG  
CGGTGCCGGAAAGCTGGCTGGAGTGCGATCTTCCTGAGGCCGATACTG  
TCGTCGTCCCCTCAAACCTGGCAGATGCACGGTTACGATGCGCCCATCTA  
CACCAACGTGACCTATCCCATTACGGTCAATCCGCCGTTTGTTCACG  
GAGAATCCGACGGGTGTTACTCGCTCACATTTAATGTTGATGAAAGCT  
GGCTACAGGAAGGCCAGACGCGAATTATTTTTGATGGCGTTCCTATTG  
GTTAAAAAATGAGCTGATTTAACAAAAATTTAATGCGAATTTTAAACA  
AATATTAACGTTTACAATTTAAATATTTGCTTATAACAATCTTCCTGTTTT  
TGGGGCTTTTTCTGATTATCAACCGGGGTACATATGATTGACATGCTAGT  
TTACGATTACCGTTCATCGATTCTCTTGTGTTGCTCCAGACTCTCAGGCA  
ATGACCTGATAGCCTTTGTAGATCTCTCAAAAATAGCTACCCTCTCCGG  
CATTAAATTTATCAGCTAGAACGGTTGAATATCATATTGATGGTGATTG  
ACTGTCTCCGGCCTTTCTCACCCCTTTTGAATCTTTACCTACACATTACTC  
AGGCATTGCATTTAAAATATATGAGGGTTCTAAAAATTTTTATCCTTGC  
GTTGAAATAAAGGCTTCTCCCGCAAAAGTATTACAGGGTCATAATGTT  
TTTGGTACAACCGATTTAGCTTTATGCTCTGAGGCTTTATTGCTTAATTT  
TGCTAATTCTTTGCCTTGCCTGTATGATTTATTGGATGTTAATGCTACTA  
CTATTAGTAGAATTGATGCCACCTTTTCAGCTCGCGCCCCAAATGAAAA  
TATAGCTAAACAGGTTATTGACCATTTGCGAAATGTATCTAATGGTCAA  
ACTAAATCTACTCGTTCGCAGAATTGGGAATCAACTGTTATATGGAAT  
GAAACTTCCAGACACCGTACTTTAGTTGCATATTTAAAACATGTTGAGC  
TACAGCATTATATTCAGCAATTAAGCTCTAAGCCATCCGCAAAAATGA  
CCTCTTATCAAAAGGAGCAATTAAGGTACTCTAATCCTGACCTGTT  
GGAGTTTGCTTCCGGTCTGGTTCGCTTTGAAGCTCGAATTA AACCGCGA  
TATTTGAAGTCTTTCGGGCTTCTCTTAATCTTTTTTGATGCAATCCGCTT  
TGCTTCTGACTATAATAGTCAGGGTAAAGACCTGATTTTTGATTTATGG  
TCATTCTCGTTTTCTGAACTGTTTAAAGCATTGAGGGGGATTCAATGA  
ATATTTATGACGATTCCGCAGTATTGGACGCTATCCAGTCTAAACATTT  
TACTATTACCCCCTCTGGCAAAACTTCTTTTGCAAAAGCCTCTCGCTAT  
TTTGGTTTTTATCGTCGTCTGGTAAACGAGGGTTATGATAGTGTTGCTC  
TACTATGCCTCGTAATTCCTTTTGGCGTTATGTATCTGCATTAGTTGAA  
TGTGGTATTCCTAAATCTCAACTGATGAATCTTCTACCTGTAATAATG  
TTGTTCCGTTAGTTCGTTTTATTAACGTAGATTTTTCTTCCCAACGTCCT  
GACTGGTATAATGAGCCAGTTCCTTAAAATCGCATAAGGTAATTCACAA  
TGATTAAGTTGAAATTAACCATCTCAAGCCCAATTTACTACTCGTTC  
TGGTGTCTCTCGTCAGGGCAAGCCTTATCACTGAATGAGCAGCTTTGT  
TACGTTGATTTGGGTAATGAATATCCGGTCTTGTCAAGATTACTCTTG  
ATGAAGGTCAGCCAGCCTATGCGCCTGGTCTGTACACCGTTCATCTGTC  
CTCTTTCAAAGTTGGTCAGTTCGGTTCCTTATGATTGACCGTCTGCGC

CTCGTTCCGGCTAAGTAACATGGAGCAGGTCGCGGATTTTCGACACAAT  
TTATCAGGCGATGATACAAATCTCCGTTGTACTTTGTTTCGCGCTTGGT  
ATAATCGCTGGGGGTCAAAGATGAGTGTTTTAGTGTATTCTTTTGCCTC  
TTTCGTTTTAGGTTGGTGCCTTCGTAGTGGCATTACGTATTTTACCCGTT  
TAATGGAAACTTCCTCATGAAAAAGTCTTTAGTCCTCAAAGCCTCTGTA  
GCCGTTGCTACCCTCGTTCGGATGCTGTCTTTCGCTGCTGAGGGTGACG  
ATCCCGCAAAAGCGGCCTTTAACTCCCTGCAAGCCTCAGCGACCGAAT  
ATATCGGTTATGCGTGGGCGATGGTTGTTGTCATTGTTCGGCGCAACTAT  
CGGTATCAAGCTGTTTAAGAAATTCACCTCGAAAGCAAGCTGATAAAC  
CGATACAATTAAGGCTCCTTTTGGAGCCTTTTTTTTTGGAGATTTTCAA  
CGTGA AAAAATTATTATTCGCAATTCCTTTAGTTGTTCCCTTTCTATTCTC  
ACTCCGCTGAAACTGTTGAAAGTTGTTTAGCAAAAATCCCATACAGAAA  
ATTCATTTACTAACGTCTGGAAAGACGACAAAACCTTTAGATCGTTACG  
CTAACTATGAGGGCTGTCTGTGGAATGCTACAGGCGTTGTAGTTTGTAC  
TGGTGACGAAACTCAGTGTTACGGTACATGGGTTCCATTGGGCTTGCT  
ATCCCTGAAAATGAGGGTGGTGGCTCTGAGGGTGGCGGTTCTGAGGGT  
GGCGGTTCTGAGGGTGGCGGTAATAACCTCCTGAGTACGGTGATAACA  
CCTATTCCGGGCTATACTTATATCAACCCTCTCGACGGCACTTATCCGC  
CTGGTACTGAGCAAAAACCCCGCTAATCCTAATCCTTCTCTTGAGGAGTC  
TCAGCCTCTTAATACTTTCATGTTTCAGAATAATAGGTTCCGAAATAGG  
CAGGGGGCATTAACTGTTTATACGGGCACTGTTACTCAAGGCACTGAC  
CCCGTTAAAACCTTATTACCAGTACACTCCTGTATCATCAAAGCCATGT  
ATGACGCTTACTGGAACGGTAAATTCAGAGACTGCGCTTCCATTCTGG  
CTTTAATGAGGATTTATTTGTTTGTGAATATCAAGGCCAATCGTCTGAC  
CTGCCTCAACCTCCTGTCAATGCTGGCGGCGGCTCTGGTGGTGGTTCTG  
GTGGCGGCTCTGAGGGTGGTGGCTCTGAGGGTGGCGGTTCTGAGGGTG  
GCGGCTCTGAGGGAGGCGGTTCCGGTGGTGGCTCTGGTTCCGGTGATT  
TTGATTATGAAAAGATGGCAAACGCTAATAAGGGGGCTATGACCGAAA  
ATGCCGATGAAAACGCGCTACAGTCTGACGCTAAAGGCAAACCTTGATT  
CTGTCGCTACTGATTACGGTGCTGCTATCGATGGTTTCATTGGTGACGT  
TTCCGGCCTTGCTAATGGTAATGGTGTACTGGTGATTTTGCTGGCTCT  
AATTCCCAAATGGCTCAAGTCGGTGACGGTGATAATTCACCTTTAATG  
AATAATTTCCGTCAATATTTACCTTCCCTCCCTCAATCGGTTGAATGTC  
GCCCTTTTGTCTTTGGCGCTGGTAAACCATATGAATTTTCTATTGATTGT  
GACAAAATAAACTTATTCCGTGGTGTCTTTGCGTTTCTTTTATATGTTGC  
CACCTTTATGTATGTATTTTCTACGTTTGCTAACATACTGCGTAATAAG  
GAGTCTTAATCATGCCAGTTCTTTTGGGTATTCCGTTATTATTGCGTTTC  
CTCGGTTTCCTTCTGGTAACTTTGTTTCGGCTATCTGCTTACTTTTCTTAA  
AAAGGGCTTCGGTAAGATAGCTATTGCTATTTCAATTGTTTCTTGCTCTT  
ATTATTGGGCTTAACTCAATTCCTTGTGGGTTATCTCTCTGATATTAGCG  
CTCAATTACCCTCTGACTTTGTTTCAGGGTGTTCAGTTAATTCTCCCGTCT  
AATGCGCTTCCCTGTTTTTATGTTATTCTCTCTGTAAAGGCTGCTATTTT  
CATTTTTGACGTTAAACAAAAAATCGTTTCTTATTTGGATTGGGATAAA

TAATATGGCTGTTTATTTTGTAACTGGCAAATTAGGCTCTGGAAAGACG  
CTCGTTAGCGTTGGTAAGATTCAGGATAAAATTGTAGCTGGGTGCAAA  
ATAGCAACTAATCTTGATTTAAGGCTTCAAACCTCCCGCAAGTCGGG  
AGGTTTCGCTAAAACGCCTCGCGTTCTTAGAATACCGGATAAGCCTTCTA  
TATCTGATTTGCTTGCTATTGGGCGCGGTAATGATTCCTACGATGAAAA  
TAAAACGGCTTGCTTGTTCTCGATGAGTGCGGTACTIONTGGTTTAATACC  
CGTTCTTGGAATGATAAGGAAAGACAGCCGATTATTGATTGGTTTCTAC  
ATGCTCGTAAATTAGGATGGGATATTATTTTTCTTGTTTCAGGACTTATC  
TATTGTTGATAAACAGGCGCGTTCTGCATTAGCTGAACATGTTGTTTAT  
TGTCGTCGTCTGGACAGAATTACTTTACCTTTTGTCGGTACTTTATATTC  
TCTTATTACTGGCTCGAAAATGCCTCTGCCTAAATTACATGTTGGCGTT  
GTAAATATGGCGATTCTCAATTAAGCCCTACTGTTGAGCGTTGGCTTT  
ATACTGGTAAGAATTTGTATAACGCATATGATACTAAACAGGCTTTTTTC  
TAGTAATTATGATTCGGTGTTTATTCTTATTTAACGCCTATTTATCAC  
ACGGTCGGTATTTCAAACCATTAAATTTAGGTCAGAAGATGAAATTA  
CTAAAATATATTTGAAAAAGTTTTCTCGCGTTCTTTGTCTTGCGATTGG  
ATTTGCATCAGCATTTACATATAGTTATATAACCCAACCTAAGCCGGAG  
GTTAAAAGGTAGTCTCTCAGACCTATGATTTTGATAAATTCACTATTG  
ACTCTTCTCAGCGTCTTAATCTAAGCTATCGCTATGTTTTCAAGGATTCT  
AAGGGAAAATTAATTAATAGCGACGATTTACAGAAGCAAGGTTATTCA  
CTCACATATATTGATTTATGTACTGTTTCCATTAAAAAAGGTAATTCAA  
ATGAAATTGTTAAATGTAATTAATTTTGTTTTCTTGATGTTTGTTTCATC  
ATCTTCTTTTGCTCAGGTAATTGAAATGAATAATTCGCCTCTGCGCGAT  
TTTGTAACCTGGTATTCAAAGCAATCAGGCGAATCCGTTATTGTTTCTC  
CCGATGTAAAAGGTACTGTTACTGTATATTCATCTGACGTTAAACCTGA  
AAATCTACGCAATTTCTTTATTTCTGTTTTACGTGCAAATAATTTTGATA  
TGGTAGGTTCTAACCTTCCATTATTCAGAAGTATAATCCAAACAATCA  
GGATTATATTGATGAATTGCCATCATCTGATAATCAGGAATATGATGAT  
AATTCCGCTCCTTCTGGTGGTTTCTTTGTTCCGCAAAATGATAATGTTA  
CTCAAACCTTTTAAAATTAATAACGTTTCGGGCAAAGGATTTAATACGAG  
TTGTCGAATTGTTTGTAAGTCTAATACTTCTAAATCCTCAAATGTATT  
ATCTATTGACGGCTCTAATCTATTAGTTGTTAGTGCTCCTAAAGATATT  
TTAGATAACCTTCCCTCAATTCCTTTCAACTGTTGATTTGCCAACTGACC  
AGATATTGATTGAGGGTTTGATATTTGAGGTTTCAGCAAGGTGATGCTTT  
AGATTTTTCATTTGCTGCTGGCTCTCAGCGTGGCACTGTTGCAGGCGGT  
GTTAATACTGACCGCCTCACCTCTGTTTTATCTTCTGCTGGTGGTTCGTT  
CGGTATTTTTAATGGCGATGTTTTAGGGCTATCAGTTCGCGCATTAAAG  
ACTAATAGCCATTCAAAAATATTGTCTGTGCCACGTATTCTTACGCTTT  
CAGGTCAGAAGGGTTCTATCTCTGTTGGCCAGAATGTCCCTTTTATTAC  
TGGTCGTGTGACTGGTGAATCTGCCAATGTAAATAATCCATTTACAGACG  
ATTGAGCGTCAAATGTAGGTATTTCCATGAGCGTTTTTCTGTTGCAA  
TGGCTGGCGGTAATATTGTTCTGGATATTACCAGCAAGGCCGATAGTTT  
GAGTTCTTCTACTCAGGCAAGTGATGTTATTACTAATCAAAGAAGTATT

GCTACAACGGTTAATTTGCGTGATGGACAGACTCTTTTACTCGGTGGCC  
TCACTGATTATAAAAACACTTCTCAGGATTCTGGCGTACCGTTCCTGTC  
TAAAATCCCTTTAATCGGCCTCCTGTTTAGCTCCCGCTCTGATTCTAAC  
GAGGAAAGCACGTTATACGTGCTCGTCAAAGCAACCATAGTACGCGCC  
CTGTAGCGGGCGCATTAAGCGCGGGCGGGTGTGGTGGTTACGCGCAGCGT  
GACCGCTACACTTGCCAGCGCCCTAGCGCCCCTCCTTTCGCTTTCTTC  
CCTTCCTTTCTCGCCACGTTTCGCCGGCTTTCCCCGTCAAGCTCTAAATC  
GGGGGCTCCCTTTAGGGTTCCGATTTAGTGCTTTACGGCACCTCGACCC  
CAAAAAACTTGATTTGGGTGATGGTTCACGTAGTGGGCCATCGCCCTG  
ATAGACGGTTTTTTCGCCCTTTGACGTTGGAGTCCACGTTCTTTAATAGT  
GGACTCTTGTTCCAAACTGGAACAACACTCAACCCTATCTCGGGCTATT  
CTTTTGATTTATAAGGGATTTTGCCGATTTTCGGAACCACCATCAAACAG  
GATTTTCGCCTGCTGGGGCAAACCAGCGTGGACCGCTTGCTGCAACTCT  
CTCAGGGCCAGGCGGTGAAGGGCAATCAGCTGTTGCCCGTCTCACTGG  
TGAAAAGAAAAACCACCCTGGCGCCCAATACGCAAACCGCCTCTCCCC  
GCGCGTTGGCCGATTCATTAATGCAGCTGGCACGACAGGTTTCCCGAC  
TGGAAGCGGGCAGTGAGCGCAACGCAATTAATGTGAGTTAGCTCACT  
CATTAGGCACCCCAGGCTTTACACTTTATGCTTCCGGCTCGTATGTTGT  
GTGGAATTGTGAGCGGATAACAATTTACACAGGAAACAGCTATGACC  
ATGATTACGAATTCGAGCTCGGTACCCGGGGATCCTCCGTCTTTATCGA  
GGTAACAAGCACACGCTAGCTTAAGCCCTGTTTACTCATTACACCAAC  
CAGGAGGTCAGAGTTCGGAGAAATGATTTATGTGAAATGCGTCAGCCG  
ATTCAAGGCCCTATATTCGTGCCACCGACGAGTTGCTTACAGATGGC  
AGGGCCGCACTGTCGGTATCATAGAGTCACTCCAGGGCGAGCGTAAAT  
AGATTAGAAGCGGGGTTATTTTGGCGGGACATTGTCATAAGGTTGACA  
ATTCAGCACTAAGGACACTTAAGTCGTGCGCATGAATTCACAACCACT  
TAGAAGAACATCCACCCTGGCTTCTCCTGAGAA
